# Supplementary material for: Facile Synthesis of 5-Aryl-N-(pyrazin-2-yl)thiophene-2-carboxamides via Suzuki Cross-Coupling Reactions, Their Electronic and Nonlinear Optical Properties through DFT Calculations
Source: MDPI journal article supplement (doi:10.3390/molecules26237309), 2021-12-02
Supplement: s1 [file s1]

## Supplementary Data

### Facile Synthesis of 5-aryl-*N*-(pyrazin-2-yl)thiophene-2-carbox-amides via Suzuki Cross-Coupling Reactions, Their Electronic and Nonlinear Optical Properties through DFT Calculations

Gulraiz Ahmad <sup>1</sup>, Nasir Rasool <sup>1,\*</sup>, Adeel Mubarik <sup>1</sup>, Ameer Fawad Zahoor <sup>1</sup>, Muhammad Ali Hashmi <sup>2</sup>, Muhammad Zubair <sup>1</sup>, Muhammad Bilal <sup>1</sup>, Mohamed Hussien <sup>3</sup>, Muhammad Saeed Akhtar <sup>4</sup> and Sajjad Haider <sup>5,\*</sup>

<sup>1</sup> Department of Chemistry, Government College, University Faisalabad, Faisalabad 38000, Pakistan;

<sup>2</sup> Department of Chemistry, University of Education, Attock Campus, Attock 43600, Pakistan;

<sup>3</sup> Department of Chemistry, Faculty of Science, King Khalid University, P.O. Box 9004, Abha 61413, Saudi Arabia;

<sup>4</sup> School of Chemical Engineering, Yeungnam University, Gyeongsan 38541, Korea;

<sup>5</sup> Chemical Engineering Department, College of Engineering, King Saud University, P.O.Box 800, Riyadh 11421, Saudi Arabia.

\* Corresponding authors E-mail addresses:

**Nasir Rasool** Email: [nasirrasool@gcuf.edu.pk](mailto:nasirrasool@gcuf.edu.pk)

**Sajjad Haider** Email: [shaider@ksu.edu.sa](mailto:shaider@ksu.edu.sa)

## Table of Contents

|                                                                                                   |     |
|---------------------------------------------------------------------------------------------------|-----|
| Table S1: Comparison of experimental and theoretical $^1\text{H}$ -NMR data of compound 4b .....  | S4  |
| Table S2: Comparison of experimental and theoretical $^1\text{H}$ -NMR data of compound 4c.....   | S5  |
| Table S3: Comparison of experimental and theoretical $^1\text{H}$ -NMR data of compound 4d .....  | S6  |
| Table S4: Comparison of experimental and theoretical $^1\text{H}$ -NMR data of compound 4e.....   | S7  |
| Table S5: Comparison of experimental and theoretical $^1\text{H}$ -NMR data of compound 4f .....  | S8  |
| Table S6: Comparison of experimental and theoretical $^1\text{H}$ -NMR data of compound 4g.....   | S9  |
| Table S7: Comparison of experimental and theoretical $^1\text{H}$ -NMR data of compound 4h .....  | S10 |
| Table S8: Comparison of experimental and theoretical $^1\text{H}$ -NMR data of compound 4i.....   | S11 |
| Table S9: Comparison of experimental and theoretical $^1\text{H}$ -NMR data of compound 4j.....   | S12 |
| Table S10: Comparison of experimental and theoretical $^1\text{H}$ -NMR data of compound 4k.....  | S13 |
| Table S11: Comparison of experimental and theoretical $^1\text{H}$ -NMR data of compound 4l.....  | S14 |
| Table S12: Comparison of experimental and theoretical $^1\text{H}$ -NMR data of compound 4m ..... | S15 |
| Table S13: Comparison of experimental and theoretical $^1\text{H}$ -NMR data of compound 4n ..... | S16 |
| Figure S1: $^1\text{H}$ NMR (400 MHz, $\text{CDCl}_3$ ) of compound 3.....                        | S17 |
| Figure S2: $^1\text{H}$ NMR (600 MHz, $\text{DMSO-d}_6$ ) of compound 4a.....                     | S18 |
| Figure S3: $^{13}\text{C}$ NMR (151 MHz, $\text{DMSO-d}_6$ ) of compound 4a.....                  | S19 |
| Figure S4: $^1\text{H}$ NMR (600 MHz, $\text{DMSO-d}_6$ ) of compound 4b.....                     | S20 |
| Figure S5: $^{13}\text{C}$ NMR (151 MHz, $\text{DMSO-d}_6$ ) of compound 4b.....                  | S21 |
| Figure S6: $^1\text{H}$ NMR (600 MHz, $\text{DMSO-d}_6$ ) of compound 4d.....                     | S22 |
| Figure S7: $^{13}\text{C}$ NMR (151 MHz, $\text{DMSO-d}_6$ ) of compound 4d.....                  | S23 |
| Figure S8: $^1\text{H}$ NMR (600 MHz, $\text{DMSO-d}_6$ ) of compound 4e.....                     | S24 |
| Figure S9: $^{13}\text{C}$ NMR (151 MHz, $\text{DMSO-d}_6$ ) of compound 4e.....                  | S25 |
| Figure S10: $^1\text{H}$ NMR (600 MHz, $\text{DMSO-d}_6$ ) of compound 4f.....                    | S26 |
| Figure S11: $^{13}\text{C}$ NMR (151 MHz, $\text{DMSO-d}_6$ ) of compound 4f.....                 | S27 |
| Figure S12: $^1\text{H}$ NMR (600 MHz, $\text{DMSO-d}_6$ ) of compound 4i.....                    | S28 |
| Figure S13: $^{13}\text{C}$ NMR (151 MHz, $\text{DMSO-d}_6$ ) of compound 4i.....                 | S29 |
| Figure S14: $^1\text{H}$ NMR (600 MHz, $\text{DMSO-d}_6$ ) of compound 4j.....                    | S30 |
| Figure S15: $^{13}\text{C}$ NMR (151 MHz, $\text{DMSO-d}_6$ ) of compound 4j.....                 | S31 |
| Figure S16: $^1\text{H}$ NMR (600 MHz, $\text{DMSO-d}_6$ ) of compound 4l.....                    | S32 |
| Figure S17: $^{13}\text{C}$ NMR (151 MHz, $\text{DMSO-d}_6$ ) of compound 4l.....                 | S33 |
| Figure S18. Potential Energy Scan of compound 4a .....                                            | S34 |

|                                                            |     |
|------------------------------------------------------------|-----|
| Figure S19. Potential Energy Scan of compound 4b .....     | S35 |
| Figure S20. Potential Energy Scan of compound 4c .....     | S36 |
| Figure S21. Potential Energy Scan of compound 4d .....     | S37 |
| Figure S22. Potential Energy Scan of compound 4e.....      | S38 |
| Figure S23. Potential Energy Scan of compound 4g.....      | S39 |
| Figure S24. Potential Energy Scan of compound 4h .....     | S40 |
| Figure S25. Potential Energy Scan of compound 4i .....     | S41 |
| Figure S26. Potential Energy Scan of compound 4j .....     | S42 |
| Figure S27. Potential Energy Scan of compound 4k.....      | S43 |
| Figure S28. Potential Energy Scan of compound 4l .....     | S44 |
| Figure S29. Potential Energy Scan of compound 4m .....     | S45 |
| Figure S30. Potential Energy Scan of compound 4n .....     | S46 |
| XYZ Coordinates of the lowest energy conformer of 4a.....  | S47 |
| XYZ Coordinates of the lowest energy conformer of 4b.....  | S48 |
| XYZ Coordinates of the lowest energy conformer of 4c.....  | S49 |
| XYZ Coordinates of the lowest energy conformer of 4d.....  | S50 |
| XYZ Coordinates of the lowest energy conformer of 4e.....  | S51 |
| XYZ Coordinates of the lowest energy conformer of 4f ..... | S52 |
| XYZ Coordinates of the lowest energy conformer of 4g.....  | S53 |
| XYZ Coordinates of the lowest energy conformer of 4h.....  | S54 |
| XYZ Coordinates of the lowest energy conformer of 4i.....  | S55 |
| XYZ Coordinates of the lowest energy conformer of 4j.....  | S56 |
| XYZ Coordinates of the lowest energy conformer of 4k.....  | S57 |
| XYZ Coordinates of the lowest energy conformer of 4l.....  | S58 |
| XYZ Coordinates of the lowest energy conformer of 4m ..... | S59 |
| XYZ Coordinates of the lowest energy conformer of 4n.....  | S60 |

**Table S1: Comparison of experimental and theoretical  $^1\text{H}$ -NMR data of compound 4b**

| Compound <b>4b</b>                   |             |                                                     |                                                 |                      |
|--------------------------------------|-------------|-----------------------------------------------------|-------------------------------------------------|----------------------|
| Carbon No.                           | Carbon Type | $^1\text{H}$ -NMR ( $\delta$ , ppm)<br>Experimental | $^1\text{H}$ -NMR ( $\delta$ , ppm)<br>Computed | $\Delta\delta$ , ppm |
| 2                                    | C           | -                                                   | -                                               | -                    |
| 3                                    | CH          | 9.38                                                | 10.59                                           | -1.21                |
| 4                                    | N           | -                                                   | -                                               | -                    |
| 5                                    | CH          | 8.47                                                | 8.44                                            | 0.03                 |
| 6                                    | CH          | 8.42                                                | 8.42                                            | 0.00                 |
| 2'                                   | C           | -                                                   | -                                               | -                    |
| 3'                                   | CH          | 8.25                                                | 7.22                                            | 1.03                 |
| 4'                                   | CH          | 8.03                                                | 6.77                                            | 1.26                 |
| 5'                                   | C           | -                                                   | -                                               | -                    |
| 1''                                  | C           | -                                                   | -                                               | -                    |
| 2''                                  | CH          | 7.74                                                | 7.58                                            | 0.16                 |
| 3''                                  | C           | -                                                   | -                                               | -                    |
| 4''                                  | C           | -                                                   | -                                               | -                    |
| 5''                                  | CH          | 7.69                                                | 7.55                                            | 0.14                 |
| 6''                                  | CH          | 7.72                                                | 7.24                                            | 0.48                 |
| Mean Absolute Error (MAE) = 0.18     |             |                                                     |                                                 |                      |
| Root Mean Square Error (RMSE) = 0.42 |             |                                                     |                                                 |                      |

**Table S2: Comparison of experimental and theoretical  $^1\text{H}$ -NMR data of compound 4c**

| Compound 4c                          |             |                                                     |                                                 |                      |
|--------------------------------------|-------------|-----------------------------------------------------|-------------------------------------------------|----------------------|
| Carbon No.                           | Carbon Type | $^1\text{H}$ -NMR ( $\delta$ , ppm)<br>Experimental | $^1\text{H}$ -NMR ( $\delta$ , ppm)<br>Computed | $\Delta\delta$ , ppm |
| 2                                    | C           | -                                                   | -                                               | -                    |
| 3                                    | CH          | 9.42                                                | 10.64                                           | -1.22                |
| 4                                    | N           | -                                                   | -                                               | -                    |
| 5                                    | CH          | 8.17                                                | 8.44                                            | -0.27                |
| 6                                    | CH          | 8.45                                                | 8.42                                            | 0.03                 |
| 2'                                   | C           | -                                                   | -                                               | -                    |
| 3'                                   | CH          | 7.90                                                | 7.26                                            | 0.64                 |
| 4'                                   | CH          | 7.86                                                | 6.82                                            | 1.04                 |
| 5'                                   | C           | -                                                   | -                                               | -                    |
| 1''                                  | C           | -                                                   | -                                               | -                    |
| 2''                                  | CH          | 8.49                                                | 7.85                                            | 0.64                 |
| 3''                                  | C           | -                                                   | -                                               | -                    |
| 4''                                  | CH          | 7.76                                                | 7.89                                            | -0.13                |
| 5''                                  | CH          | 7.56                                                | 7.54                                            | 0.02                 |
| 6''                                  | CH          | 7.62                                                | 7.62                                            | 0.00                 |
| Mean Absolute Error (MAE) = 0.17     |             |                                                     |                                                 |                      |
| Root Mean Square Error (RMSE) = 0.38 |             |                                                     |                                                 |                      |

**Table S3: Comparison of experimental and theoretical  $^1\text{H}$ -NMR data of compound 4d**

| Compound <b>4d</b>                   |             |                                                     |                                                 |                      |
|--------------------------------------|-------------|-----------------------------------------------------|-------------------------------------------------|----------------------|
| Carbon No.                           | Carbon Type | $^1\text{H}$ -NMR ( $\delta$ , ppm)<br>Experimental | $^1\text{H}$ -NMR ( $\delta$ , ppm)<br>Computed | $\Delta\delta$ , ppm |
| 2                                    | C           | -                                                   | -                                               | -                    |
| 3                                    | CH          | 9.39                                                | 10.57                                           | -1.18                |
| 4                                    | N           | -                                                   | -                                               | -                    |
| 5                                    | CH          | 8.41                                                | 8.43                                            | -0.02                |
| 6                                    | CH          | 8.47                                                | 8.42                                            | 0.05                 |
| 2'                                   | C           | -                                                   | -                                               | -                    |
| 3'                                   | CH          | 8.25                                                | 7.22                                            | 1.03                 |
| 4'                                   | CH          | 7.64                                                | 6.72                                            | 0.92                 |
| 5'                                   | C           | -                                                   | -                                               | -                    |
| 1''                                  | C           | -                                                   | -                                               | -                    |
| 2''                                  | CH          | 7.51                                                | 7.39                                            | 0.12                 |
| 3''                                  | CH          | 7.77                                                | 7.41                                            | 0.36                 |
| 4''                                  | C           | -                                                   | -                                               | -                    |
| 5''                                  | CH          | 7.77                                                | 7.41                                            | 0.36                 |
| 6''                                  | CH          | 7.51                                                | 7.39                                            | 0.12                 |
| Mean Absolute Error (MAE) = 0.17     |             |                                                     |                                                 |                      |
| Root Mean Square Error (RMSE) = 0.38 |             |                                                     |                                                 |                      |

**Table S4: Comparison of experimental and theoretical  $^1\text{H}$ -NMR data of compound 4e**

| Compound 4e                          |             |                                                     |                                                 |                      |
|--------------------------------------|-------------|-----------------------------------------------------|-------------------------------------------------|----------------------|
| Carbon No.                           | Carbon Type | $^1\text{H}$ -NMR ( $\delta$ , ppm)<br>Experimental | $^1\text{H}$ -NMR ( $\delta$ , ppm)<br>Computed | $\Delta\delta$ , ppm |
| 2                                    | C           | -                                                   | -                                               | -                    |
| 3                                    | CH          | 9.38                                                | 10.63                                           | -1.25                |
| 4                                    | N           | -                                                   | -                                               | -                    |
| 5                                    | CH          | 8.42                                                | 8.44                                            | -0.02                |
| 6                                    | CH          | 8.48                                                | 8.42                                            | 0.06                 |
| 2'                                   | C           | -                                                   | -                                               | -                    |
| 3'                                   | CH          | 8.25                                                | 7.22                                            | 1.04                 |
| 4'                                   | CH          | 8.01                                                | 6.77                                            | 1.25                 |
| 5'                                   | C           | -                                                   | -                                               | -                    |
| 1''                                  | C           | -                                                   | -                                               | -                    |
| 2''                                  | CH          | 7.76                                                | 7.57                                            | 0.19                 |
| 3''                                  | C           | -                                                   | -                                               | -                    |
| 4''                                  | C           | -                                                   | -                                               | -                    |
| 5''                                  | CH          | 7.51                                                | 7.27                                            | 0.24                 |
| 6''                                  | CH          | 7.68                                                | 7.32                                            | 0.36                 |
| Mean Absolute Error (MAE) = 0.18     |             |                                                     |                                                 |                      |
| Root Mean Square Error (RMSE) = 0.42 |             |                                                     |                                                 |                      |

**Table S5: Comparison of experimental and theoretical  $^1\text{H}$ -NMR data of compound 4f**

| Compound 4f                          |             |                                                     |                                                 |                      |
|--------------------------------------|-------------|-----------------------------------------------------|-------------------------------------------------|----------------------|
| Carbon No.                           | Carbon Type | $^1\text{H}$ -NMR ( $\delta$ , ppm)<br>Experimental | $^1\text{H}$ -NMR ( $\delta$ , ppm)<br>Computed | $\Delta\delta$ , ppm |
| 2                                    | C           | -                                                   | -                                               | -                    |
| 3                                    | CH          | 9.40                                                | 10.63                                           | -1.23                |
| 4                                    | N           | -                                                   | -                                               | -                    |
| 5                                    | CH          | 8.39                                                | 8.40                                            | -0.01                |
| 6                                    | CH          | 8.44                                                | 8.40                                            | 0.04                 |
| 2'                                   | C           | -                                                   | -                                               | -                    |
| 3'                                   | CH          | 8.23                                                | 7.20                                            | 1.03                 |
| 4'                                   | CH          | 7.52                                                | 7.14                                            | 0.38                 |
| 5'                                   | C           | -                                                   | -                                               | -                    |
| 1''                                  | C           | -                                                   | -                                               | -                    |
| 2''                                  | CH          | 7.32                                                | 7.37                                            | -0.05                |
| 3''                                  | C           | -                                                   | -                                               | -                    |
| 4''                                  | CH          | 6.97                                                | 7.15                                            | -0.18                |
| 5''                                  | C           | -                                                   | -                                               | -                    |
| 6''                                  | CH          | 7.32                                                | 7.35                                            | -0.03                |
| Mean Absolute Error (MAE) = 0.12     |             |                                                     |                                                 |                      |
| Root Mean Square Error (RMSE) = 0.33 |             |                                                     |                                                 |                      |



**Table S6: Comparison of experimental and theoretical  $^1\text{H}$ -NMR data of compound 4g**

| Compound 4g                          |             |                                                     |                                                 |                      |
|--------------------------------------|-------------|-----------------------------------------------------|-------------------------------------------------|----------------------|
| Carbon No.                           | Carbon Type | $^1\text{H}$ -NMR ( $\delta$ , ppm)<br>Experimental | $^1\text{H}$ -NMR ( $\delta$ , ppm)<br>Computed | $\Delta\delta$ , ppm |
| 2                                    | C           | -                                                   | -                                               | -                    |
| 3                                    | CH          | 9.33                                                | 10.58                                           | -1.25                |
| 4                                    | N           | -                                                   | -                                               | -                    |
| 5                                    | CH          | 8.41                                                | 8.39                                            | 0.02                 |
| 6                                    | CH          | 8.46                                                | 8.40                                            | 0.06                 |
| 2'                                   | C           | -                                                   | -                                               | -                    |
| 3'                                   | CH          | 8.26                                                | 7.18                                            | 1.08                 |
| 4'                                   | CH          | 8.22                                                | 6.65                                            | 1.57                 |
| 5'                                   | C           | -                                                   | -                                               | -                    |
| 1''                                  | C           | -                                                   | -                                               | -                    |
| 2''                                  | CH          | 7.66                                                | 7.42                                            | 0.24                 |
| 3''                                  | CH          | 7.33                                                | 6.58                                            | 0.75                 |
| 4''                                  | C           | -                                                   | -                                               | -                    |
| 5''                                  | CH          | 7.33                                                | 7.19                                            | 0.14                 |
| 6''                                  | CH          | 7.66                                                | 7.43                                            | 0.23                 |
| Mean Absolute Error (MAE) = 0.22     |             |                                                     |                                                 |                      |
| Root Mean Square Error (RMSE) = 0.49 |             |                                                     |                                                 |                      |

**Table S7: Comparison of experimental and theoretical  $^1\text{H}$ -NMR data of compound 4h**

| Compound 4h                          |             |                                                     |                                                 |                      |
|--------------------------------------|-------------|-----------------------------------------------------|-------------------------------------------------|----------------------|
| Carbon No.                           | Carbon Type | $^1\text{H}$ -NMR ( $\delta$ , ppm)<br>Experimental | $^1\text{H}$ -NMR ( $\delta$ , ppm)<br>Computed | $\Delta\delta$ , ppm |
| 2                                    | C           | -                                                   | -                                               | -                    |
| 3                                    | CH          | 9.38                                                | 10.58                                           | -1.20                |
| 4                                    | N           | -                                                   | -                                               | -                    |
| 5                                    | CH          | 8.41                                                | 8.44                                            | -0.03                |
| 6                                    | CH          | 8.48                                                | 8.42                                            | 0.06                 |
| 2'                                   | C           | -                                                   | -                                               | -                    |
| 3'                                   | CH          | 8.26                                                | 7.25                                            | 1.01                 |
| 4'                                   | CH          | 7.94                                                | 6.82                                            | 1.12                 |
| 5'                                   | C           | -                                                   | -                                               | -                    |
| 1''                                  | C           | -                                                   | -                                               | -                    |
| 2''                                  | CH          | 7.24                                                | 7.57                                            | -0.33                |
| 3''                                  | CH          | 7.78                                                | 8.33                                            | -0.55                |
| 4''                                  | C           | -                                                   | -                                               | -                    |
| 5''                                  | CH          | 7.78                                                | 8.54                                            | -0.76                |
| 6''                                  | CH          | 7.24                                                | 7.52                                            | -0.28                |
| Mean Absolute Error (MAE) = 0.22     |             |                                                     |                                                 |                      |
| Root Mean Square Error (RMSE) = 0.44 |             |                                                     |                                                 |                      |

**Table S8: Comparison of experimental and theoretical  $^1\text{H}$ -NMR data of compound 4i**

| Compound 4i                          |             |                                                     |                                                 |                      |
|--------------------------------------|-------------|-----------------------------------------------------|-------------------------------------------------|----------------------|
| Carbon No.                           | Carbon Type | $^1\text{H}$ -NMR ( $\delta$ , ppm)<br>Experimental | $^1\text{H}$ -NMR ( $\delta$ , ppm)<br>Computed | $\Delta\delta$ , ppm |
| 2                                    | C           | -                                                   | -                                               | -                    |
| 3                                    | CH          | 9.38                                                | 10.57                                           | -1.19                |
| 4                                    | N           | -                                                   | -                                               | -                    |
| 5                                    | CH          | 8.41                                                | 8.40                                            | 0.01                 |
| 6                                    | CH          | 8.47                                                | 8.40                                            | 0.07                 |
| 2'                                   | C           | -                                                   | -                                               | -                    |
| 3'                                   | CH          | 8.24                                                | 7.19                                            | 1.05                 |
| 4'                                   | CH          | 7.70                                                | 6.66                                            | 1.04                 |
| 5'                                   | C           | -                                                   | -                                               | -                    |
| 1''                                  | C           | -                                                   | -                                               | -                    |
| 2''                                  | CH          | 7.70                                                | 7.33                                            | 0.37                 |
| 3''                                  | CH          | 7.33                                                | 6.87                                            | 0.46                 |
| 4''                                  | C           | -                                                   | -                                               | -                    |
| 5''                                  | CH          | 7.33                                                | 7.20                                            | 0.13                 |
| 6''                                  | CH          | 7.60                                                | 7.30                                            | 0.30                 |
| Mean Absolute Error (MAE) = 0.19     |             |                                                     |                                                 |                      |
| Root Mean Square Error (RMSE) = 0.41 |             |                                                     |                                                 |                      |

**Table S9: Comparison of experimental and theoretical  $^1\text{H}$ -NMR data of compound 4j**

| Compound 4j                          |             |                                                     |                                                 |                      |
|--------------------------------------|-------------|-----------------------------------------------------|-------------------------------------------------|----------------------|
| Carbon No.                           | Carbon Type | $^1\text{H}$ -NMR ( $\delta$ , ppm)<br>Experimental | $^1\text{H}$ -NMR ( $\delta$ , ppm)<br>Computed | $\Delta\delta$ , ppm |
| 2                                    | C           | -                                                   | -                                               | -                    |
| 3                                    | CH          | 9.37                                                | 10.52                                           | -1.15                |
| 4                                    | N           | -                                                   | -                                               | -                    |
| 5                                    | CH          | 8.26                                                | 8.44                                            | -0.18                |
| 6                                    | CH          | 8.47                                                | 8.43                                            | 0.04                 |
| 2'                                   | C           | -                                                   | -                                               | -                    |
| 3'                                   | CH          | 7.76                                                | 7.25                                            | 0.51                 |
| 4'                                   | CH          | 7.61                                                | 6.82                                            | 0.79                 |
| 5'                                   | C           | -                                                   | -                                               | -                    |
| 1''                                  | C           | -                                                   | -                                               | -                    |
| 2''                                  | CH          | 7.52                                                | 6.92                                            | 0.60                 |
| 3''                                  | C           | -                                                   | -                                               | -                    |
| 4''                                  | CH          | 7.26                                                | 6.95                                            | 0.31                 |
| 5''                                  | C           | -                                                   | -                                               | -                    |
| 6''                                  | CH          | 7.52                                                | 6.95                                            | 0.57                 |
| Mean Absolute Error (MAE) = 0.17     |             |                                                     |                                                 |                      |
| Root Mean Square Error (RMSE) = 0.35 |             |                                                     |                                                 |                      |

**Table S10: Comparison of experimental and theoretical  $^1\text{H}$ -NMR data of compound 4k**

| Compound 4k                          |             |                                                     |                                                 |                      |
|--------------------------------------|-------------|-----------------------------------------------------|-------------------------------------------------|----------------------|
| Carbon No.                           | Carbon Type | $^1\text{H}$ -NMR ( $\delta$ , ppm)<br>Experimental | $^1\text{H}$ -NMR ( $\delta$ , ppm)<br>Computed | $\Delta\delta$ , ppm |
| 2                                    | C           | -                                                   | -                                               | -                    |
| 3                                    | CH          | 9.42                                                | 10.56                                           | -1.14                |
| 4                                    | N           | -                                                   | -                                               | -                    |
| 5                                    | CH          | 8.44                                                | 8.43                                            | 0.01                 |
| 6                                    | CH          | 8.49                                                | 8.41                                            | 0.08                 |
| 2'                                   | C           | -                                                   | -                                               | -                    |
| 3'                                   | CH          | 8.28                                                | 7.19                                            | 1.09                 |
| 4'                                   | CH          | 7.52                                                | 6.73                                            | 0.79                 |
| 5'                                   | C           | -                                                   | -                                               | -                    |
| 1''                                  | C           | -                                                   | -                                               | -                    |
| 2''                                  | C           | -                                                   | -                                               | -                    |
| 3''                                  | CH          | 7.30                                                | 6.78                                            | 0.52                 |
| 4''                                  | CH          | 7.12                                                | 6.63                                            | 0.49                 |
| 5''                                  | C           | -                                                   | -                                               | -                    |
| Mean Absolute Error (MAE) = 0.17     |             |                                                     |                                                 |                      |
| Root Mean Square Error (RMSE) = 0.38 |             |                                                     |                                                 |                      |

**Table S11: Comparison of experimental and theoretical  $^1\text{H}$ -NMR data of compound 4l**

| Compound 4l                          |             |                                                     |                                                 |                      |
|--------------------------------------|-------------|-----------------------------------------------------|-------------------------------------------------|----------------------|
| Carbon No.                           | Carbon Type | $^1\text{H}$ -NMR ( $\delta$ , ppm)<br>Experimental | $^1\text{H}$ -NMR ( $\delta$ , ppm)<br>Computed | $\Delta\delta$ , ppm |
| 2                                    | C           | -                                                   | -                                               | -                    |
| 3                                    | CH          | 9.37                                                | 10.57                                           | -1.20                |
| 4                                    | N           | -                                                   | -                                               | -                    |
| 5                                    | CH          | 8.41                                                | 8.40                                            | 0.01                 |
| 6                                    | CH          | 8.47                                                | 8.40                                            | 0.07                 |
| 2'                                   | C           | -                                                   | -                                               | -                    |
| 3'                                   | CH          | 8.18                                                | 7.15                                            | 1.04                 |
| 4'                                   | CH          | 7.30                                                | 6.71                                            | 0.59                 |
| 5'                                   | C           | -                                                   | -                                               | -                    |
| 1''                                  | C           | -                                                   | -                                               | -                    |
| 2''                                  | C           | -                                                   | -                                               | -                    |
| 3''                                  | CH          | 6.84                                                | 6.76                                            | 0.08                 |
| 4''                                  | CH          | 7.30                                                | 6.46                                            | 0.84                 |
| 5''                                  | C           | -                                                   | -                                               | -                    |
| Mean Absolute Error (MAE) = 0.16     |             |                                                     |                                                 |                      |
| Root Mean Square Error (RMSE) = 0.38 |             |                                                     |                                                 |                      |

**Table S12: Comparison of experimental and theoretical  $^1\text{H}$ -NMR data of compound 4m**

| Compound <b>4m</b>                   |             |                                                     |                                                 |                      |
|--------------------------------------|-------------|-----------------------------------------------------|-------------------------------------------------|----------------------|
| Carbon No.                           | Carbon Type | $^1\text{H}$ -NMR ( $\delta$ , ppm)<br>Experimental | $^1\text{H}$ -NMR ( $\delta$ , ppm)<br>Computed | $\Delta\delta$ , ppm |
| 2                                    | C           | -                                                   | -                                               | -                    |
| 3                                    | CH          | 9.09                                                | 10.56                                           | -1.47                |
| 4                                    | N           | -                                                   | -                                               | -                    |
| 5                                    | CH          | 8.49                                                | 8.48                                            | 0.01                 |
| 6                                    | CH          | 8.61                                                | 8.45                                            | 0.16                 |
| 2'                                   | C           | -                                                   | -                                               | -                    |
| 3'                                   | CH          | 7.89                                                | 7.28                                            | 0.61                 |
| 4'                                   | CH          | 7.71                                                | 6.85                                            | 0.86                 |
| 5'                                   | C           | -                                                   | -                                               | -                    |
| 1''                                  | C           | -                                                   | -                                               | -                    |
| 2''                                  | CH          | 8.02                                                | 8.01                                            | 0.01                 |
| 3''                                  | C           | -                                                   | -                                               | -                    |
| 4''                                  | CH          | 8.45                                                | 8.23                                            | 0.22                 |
| 5''                                  | C           | -                                                   | -                                               | -                    |
| 6''                                  | CH          | 8.02                                                | 8.06                                            | -0.04                |
| Mean Absolute Error (MAE) = 0.14     |             |                                                     |                                                 |                      |
| Root Mean Square Error (RMSE) = 0.37 |             |                                                     |                                                 |                      |

**Table S13: Comparison of experimental and theoretical  $^1\text{H}$ -NMR data of compound 4n**

| Compound <b>4n</b>                   |             |                                                     |                                                 |                      |
|--------------------------------------|-------------|-----------------------------------------------------|-------------------------------------------------|----------------------|
| Carbon No.                           | Carbon Type | $^1\text{H}$ -NMR ( $\delta$ , ppm)<br>Experimental | $^1\text{H}$ -NMR ( $\delta$ , ppm)<br>Computed | $\Delta\delta$ , ppm |
| 2                                    | C           | -                                                   | -                                               | -                    |
| 3                                    | CH          | 9.13                                                | 10.57                                           | -1.44                |
| 4                                    | N           | -                                                   | -                                               | -                    |
| 5                                    | CH          | 8.51                                                | 8.46                                            | 0.05                 |
| 6                                    | CH          | 8.54                                                | 8.44                                            | 0.10                 |
| 2'                                   | C           | -                                                   | -                                               | -                    |
| 3'                                   | CH          | 8.00                                                | 7.28                                            | 0.72                 |
| 4'                                   | CH          | 7.85                                                | 6.88                                            | 0.97                 |
| 5'                                   | C           | -                                                   | -                                               | -                    |
| 1''                                  | C           | -                                                   | -                                               | -                    |
| 2''                                  | CH          | 8.48                                                | 7.68                                            | 0.80                 |
| 3''                                  | C           | -                                                   | -                                               | -                    |
| 4''                                  | CH          | 7.66                                                | 7.74                                            | -0.08                |
| 5''                                  | C           | -                                                   | -                                               | -                    |
| 6''                                  | CH          | 8.04                                                | 7.69                                            | 0.36                 |
| Mean Absolute Error (MAE) = 0.19     |             |                                                     |                                                 |                      |
| Root Mean Square Error (RMSE) = 0.42 |             |                                                     |                                                 |                      |



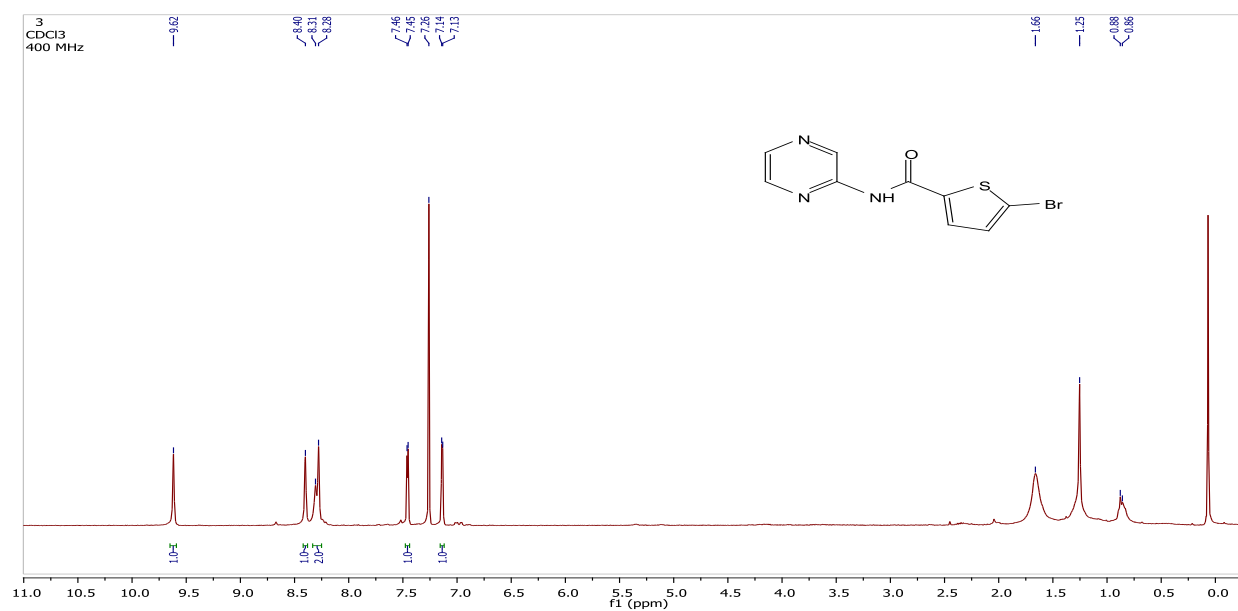

**Figure S1: <sup>1</sup>H NMR (400 MHz, CDCl<sub>3</sub>) of compound 3.**

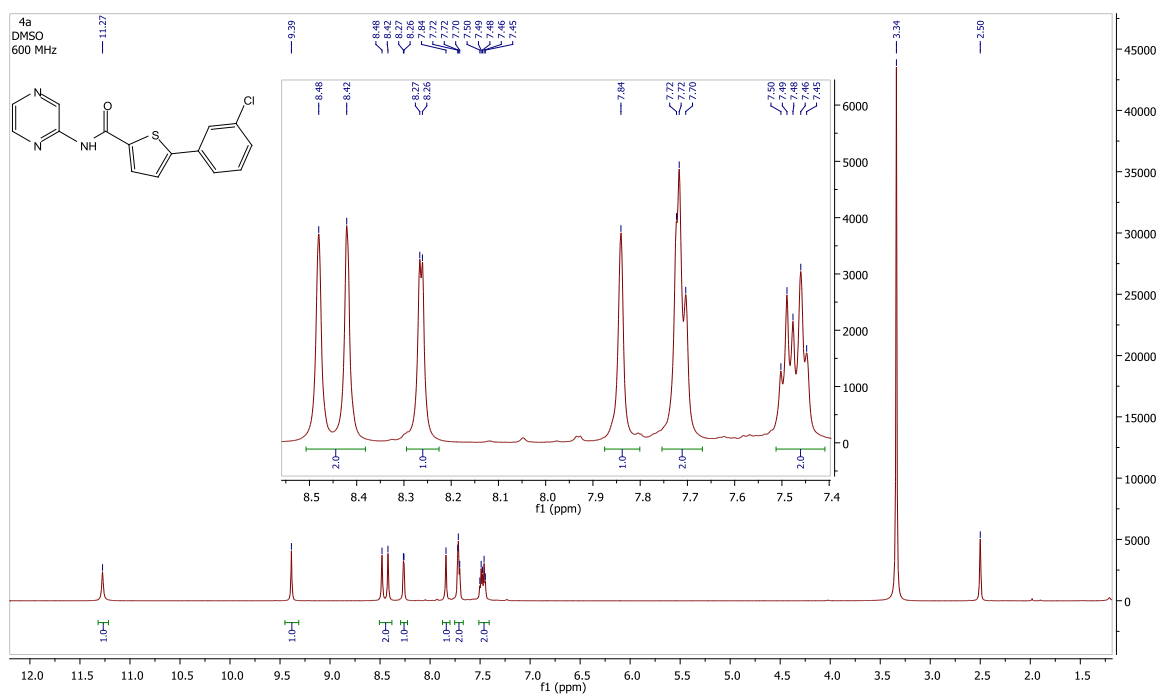

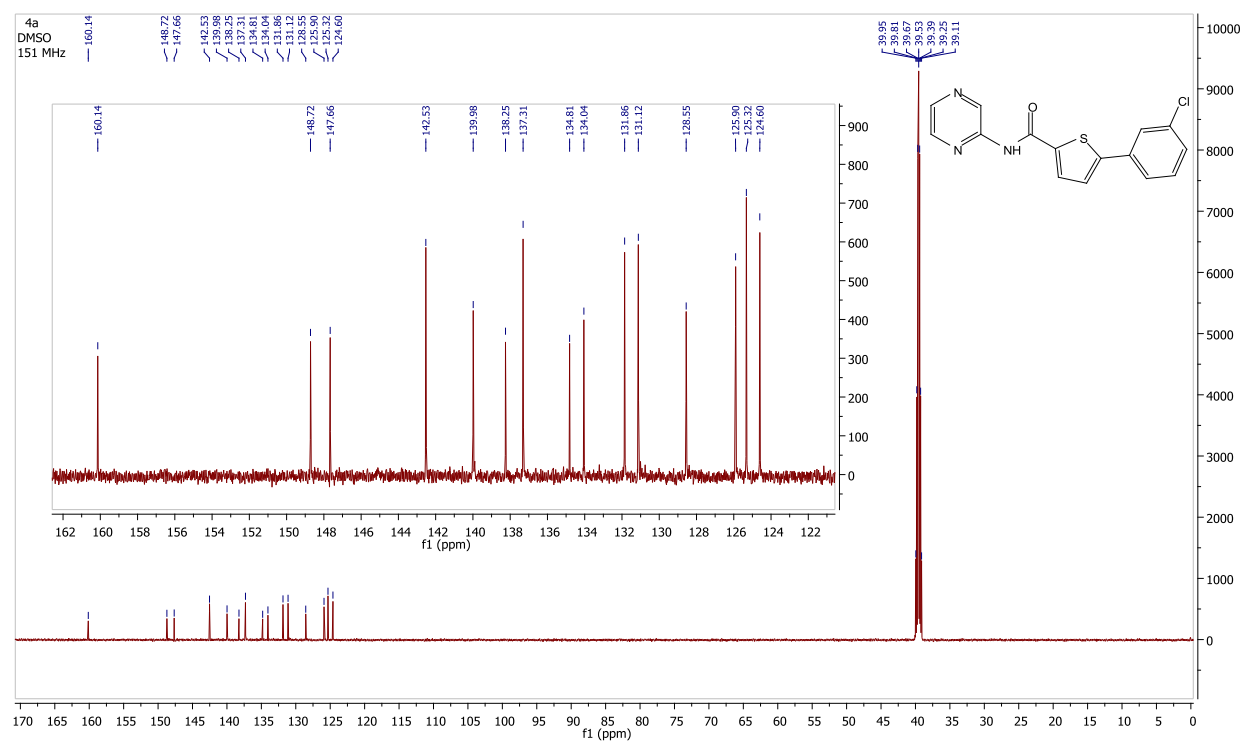

Figure S3:  $^{13}\text{C}$  NMR (151 MHz, DMSO- $\text{d}_6$ ) of compound 4a.

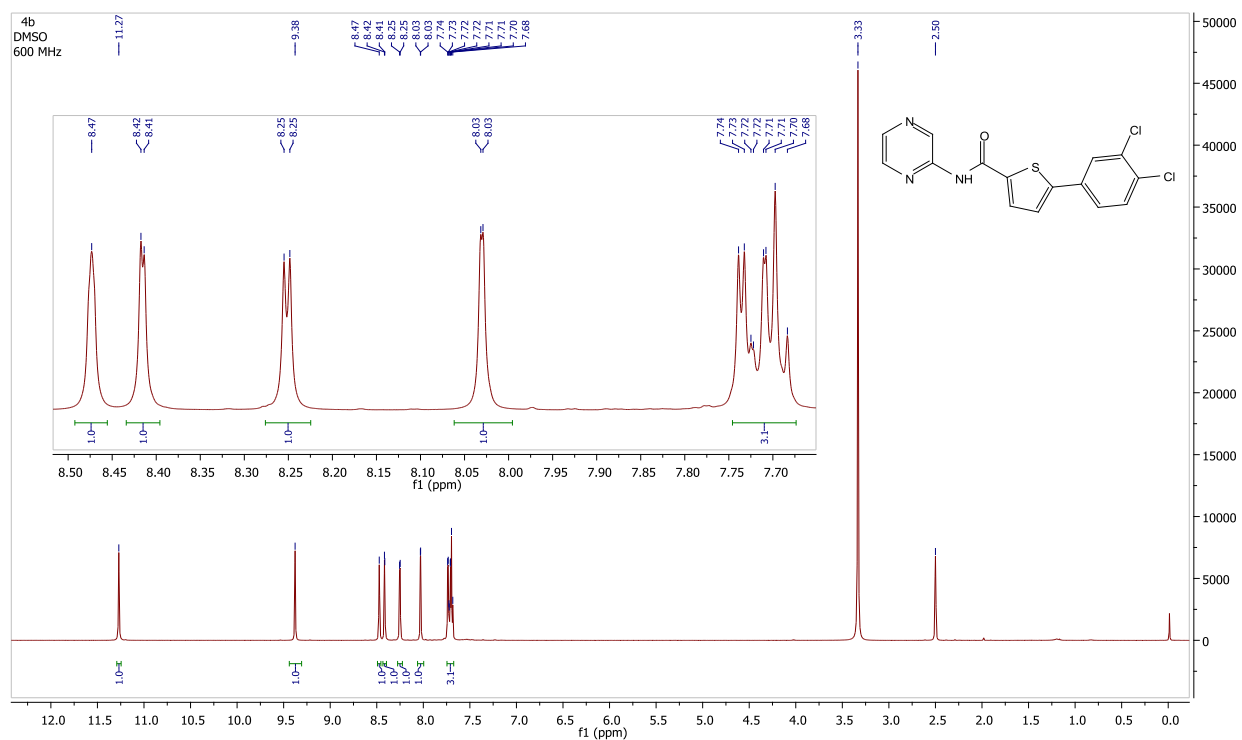

**Figure S4:  $^1\text{H}$  NMR (600 MHz, DMSO- $\text{d}_6$ ) of compound 4b.**

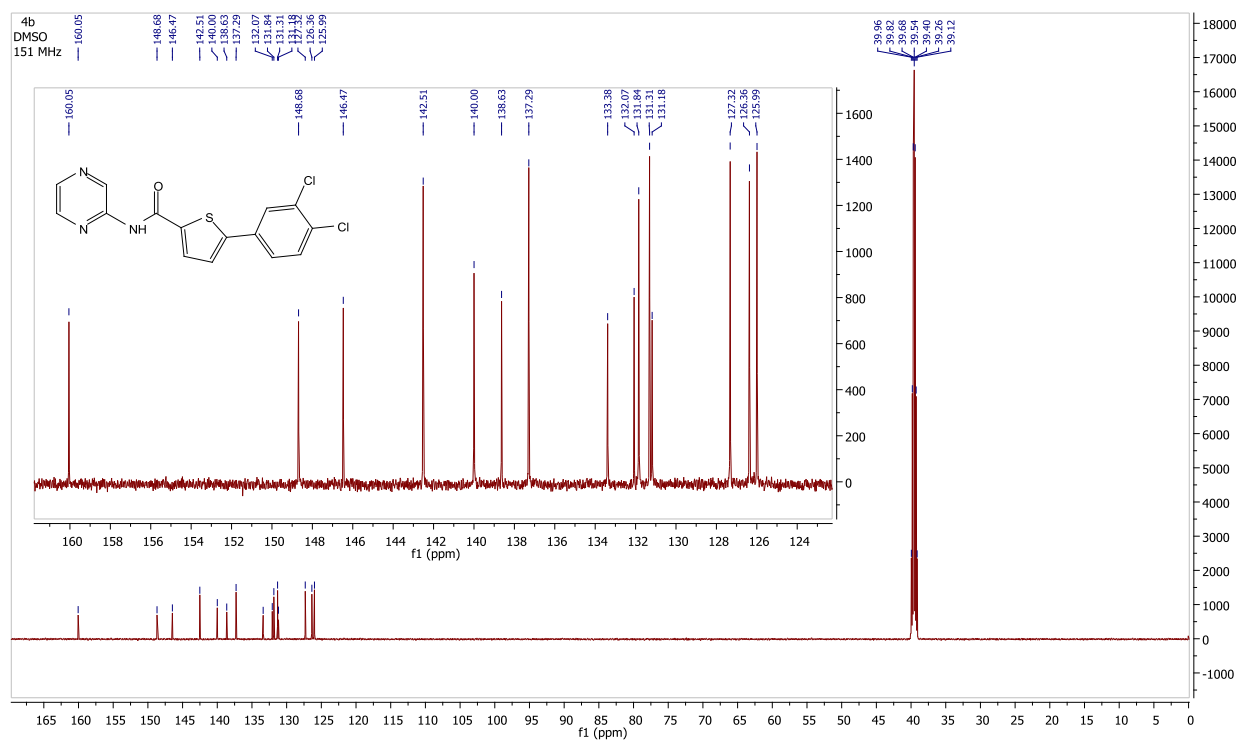

Figure S5:  $^{13}\text{C}$  NMR (151 MHz, DMSO- $\text{d}_6$ ) of compound 4b.

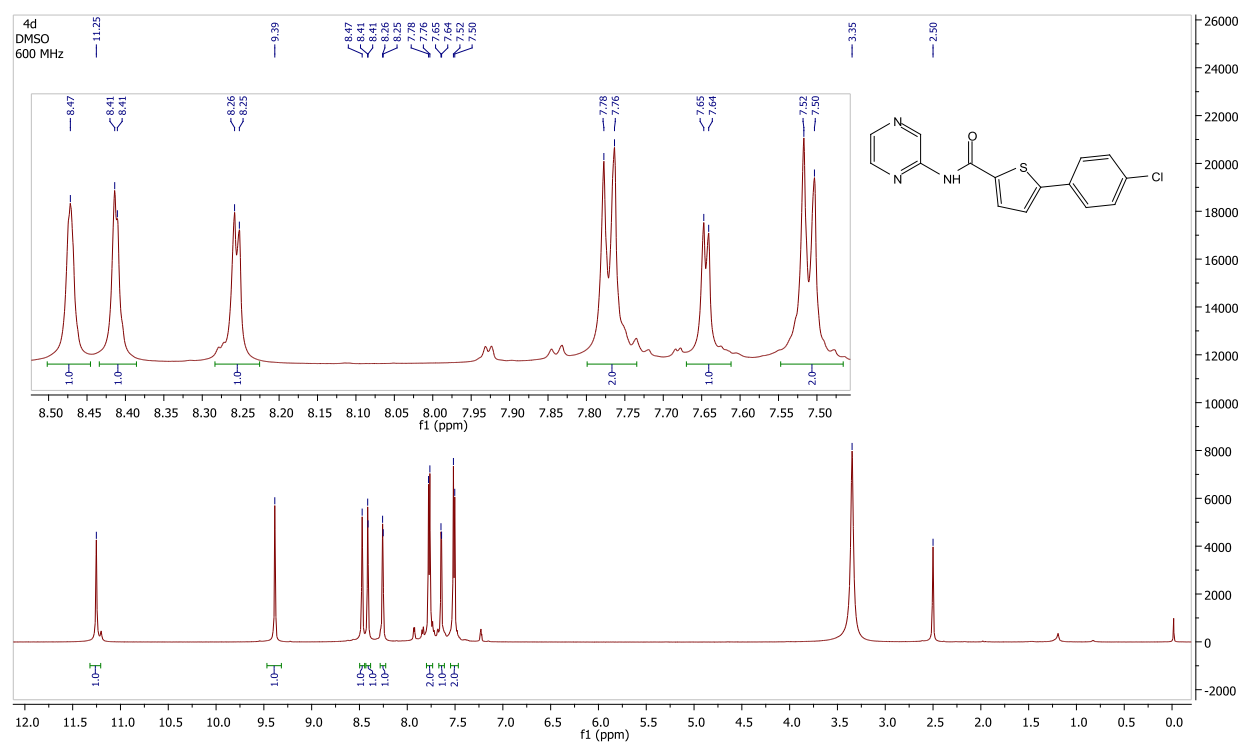

**Figure S6:  $^1\text{H}$  NMR (600 MHz, DMSO- $\text{d}_6$ ) of compound 4d.**

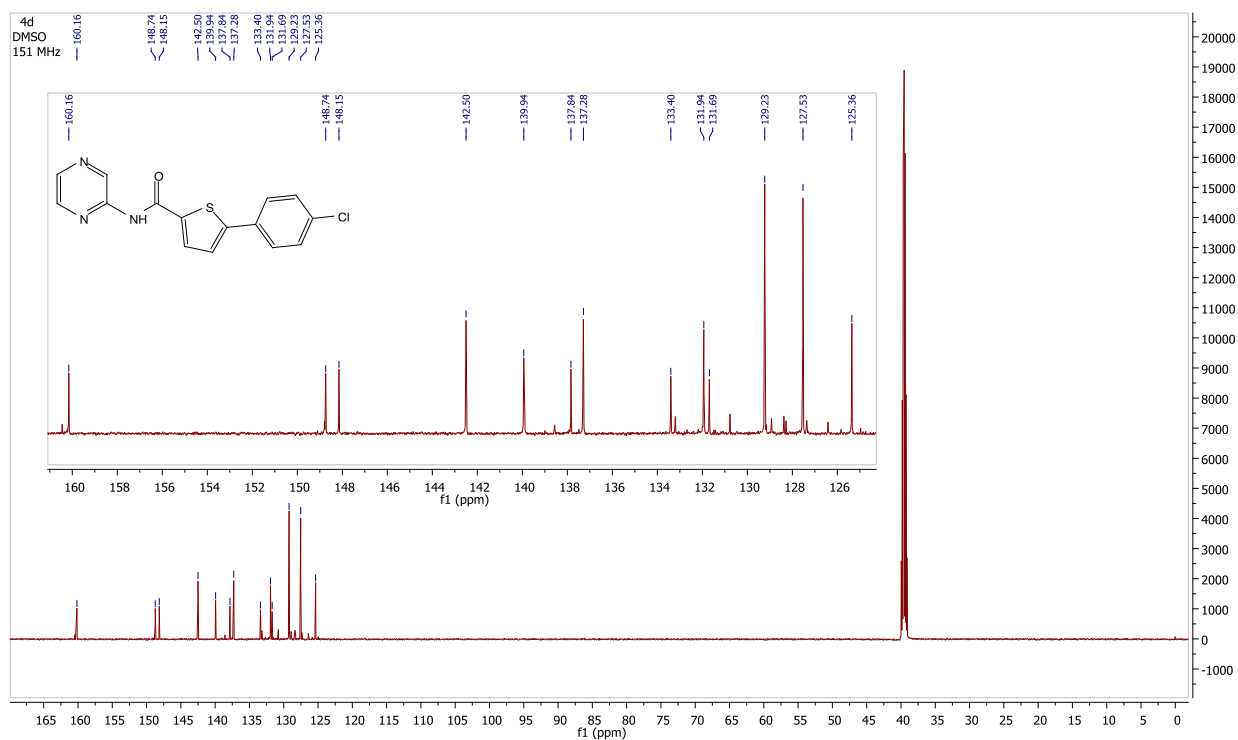

**Figure S7:  $^{13}\text{C}$  NMR (151 MHz, DMSO- $\text{d}_6$ ) of compound 4d.**

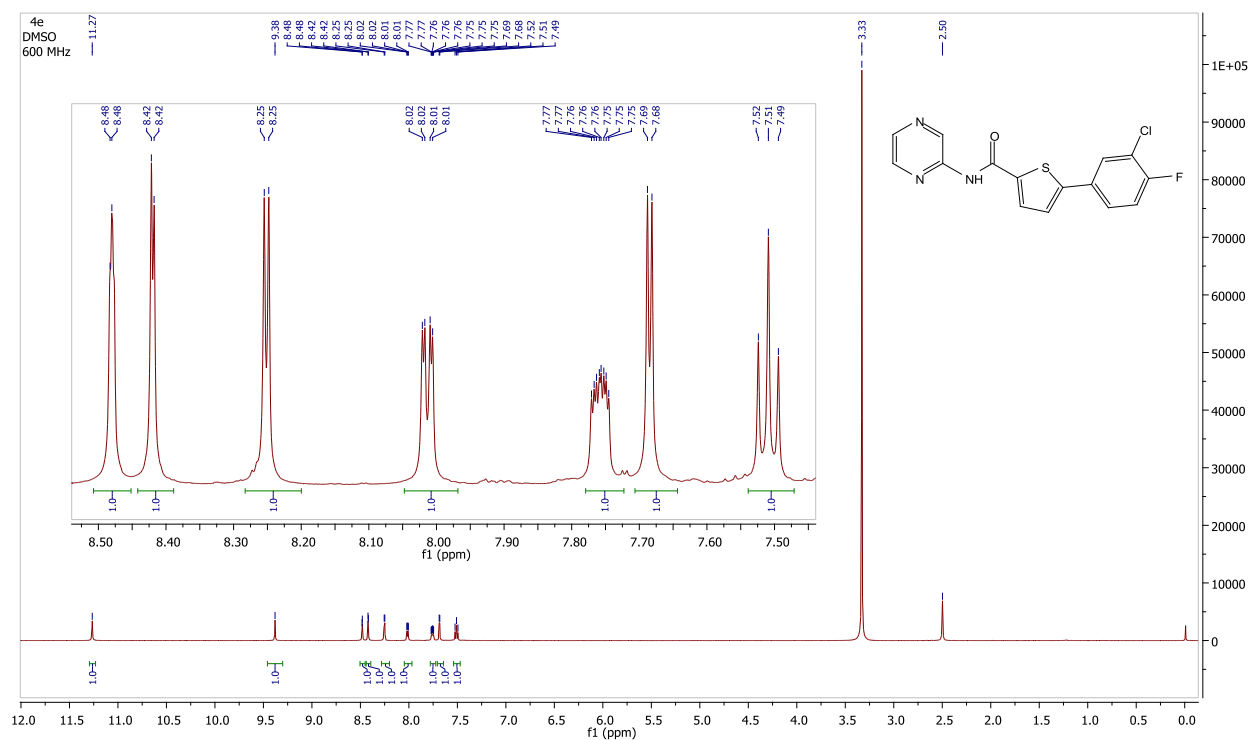

**Figure S8:  $^1\text{H}$  NMR (600 MHz, DMSO- $\text{d}_6$ ) of compound 4e.**



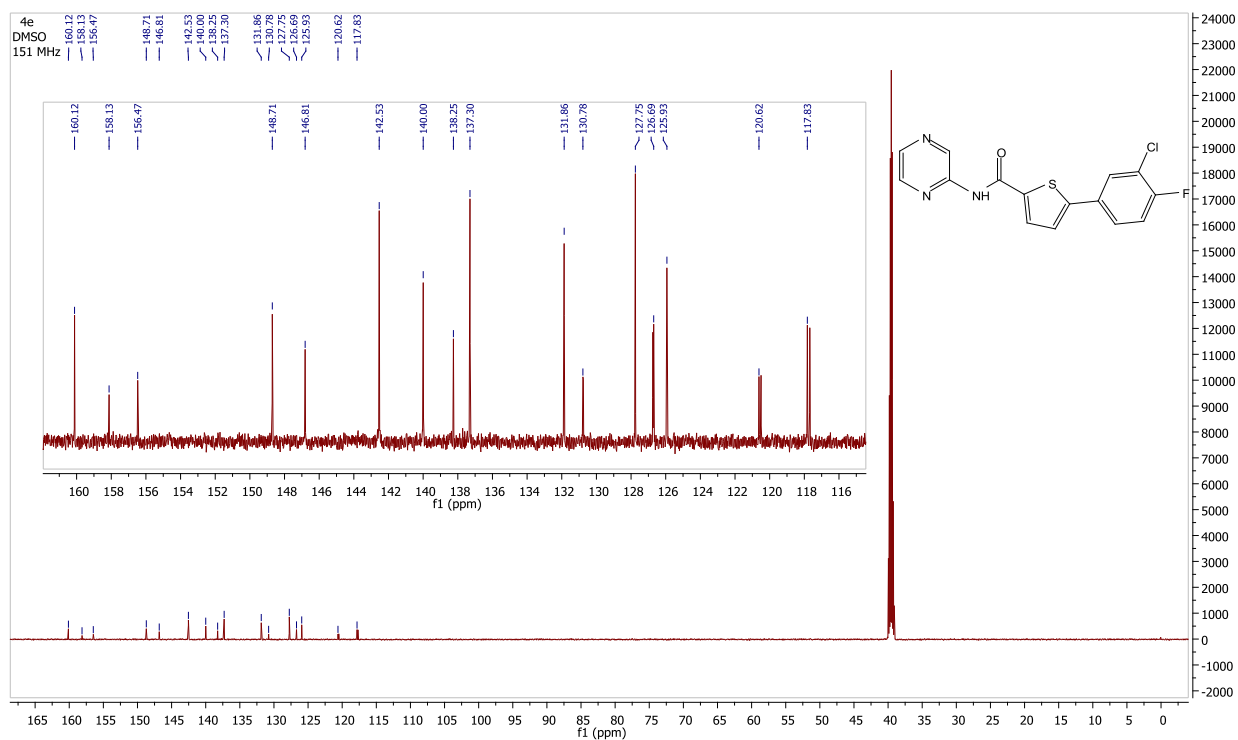

Figure S9:  $^{13}\text{C}$  NMR (151 MHz, DMSO- $\text{d}_6$ ) of compound 4e.

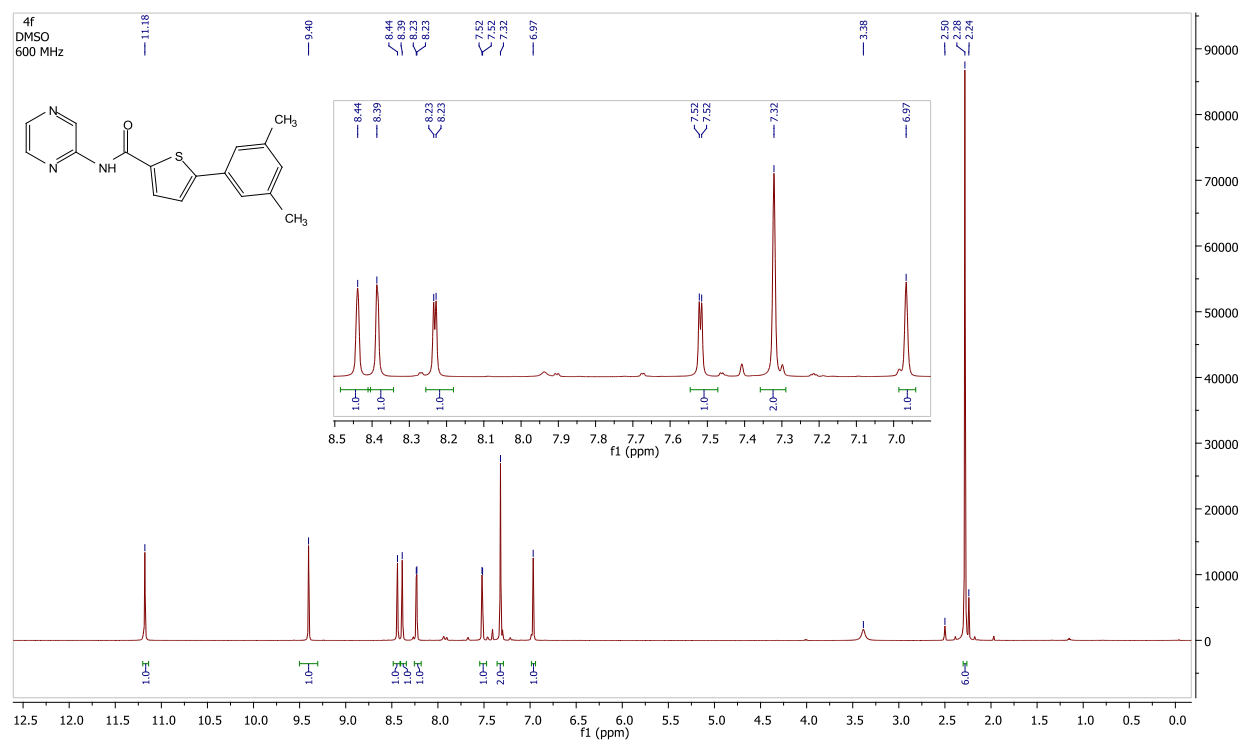

**Figure S10:  $^1\text{H}$  NMR (600 MHz, DMSO- $\text{d}_6$ ) of compound 4f.**

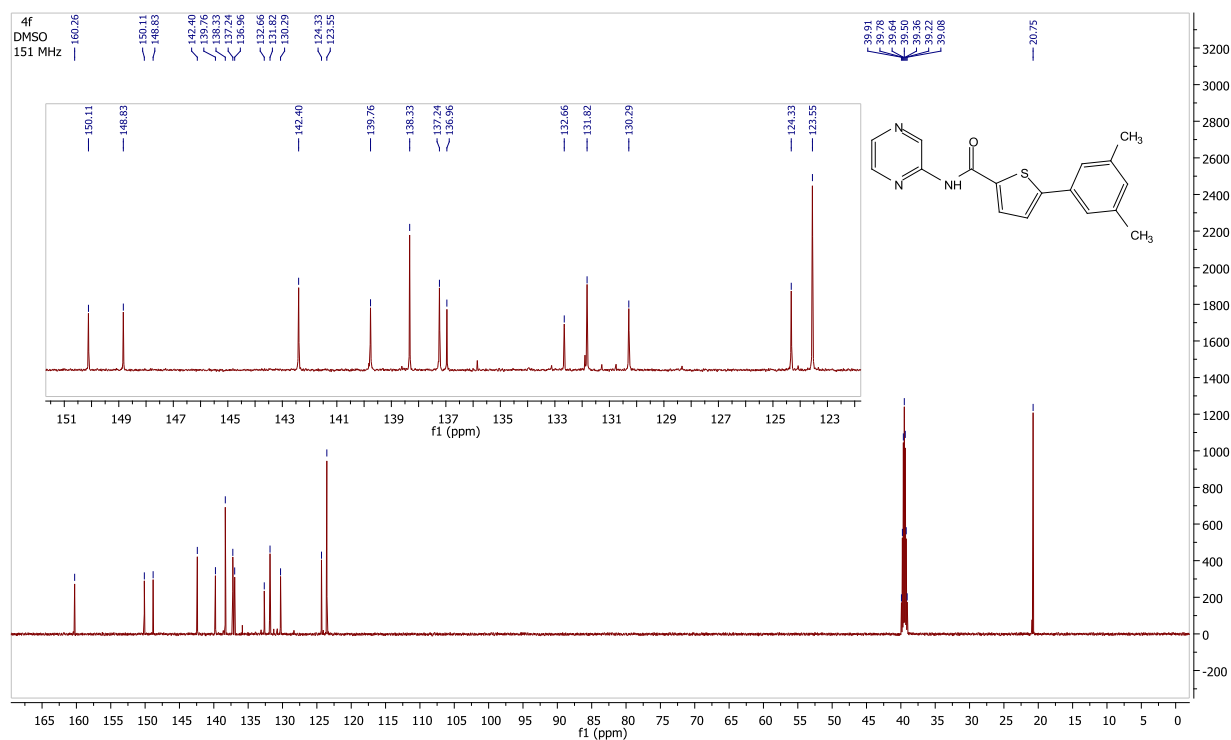

**Figure S11:**  $^{13}\text{C}$  NMR (151 MHz, DMSO- $\text{d}_6$ ) of compound 4f.

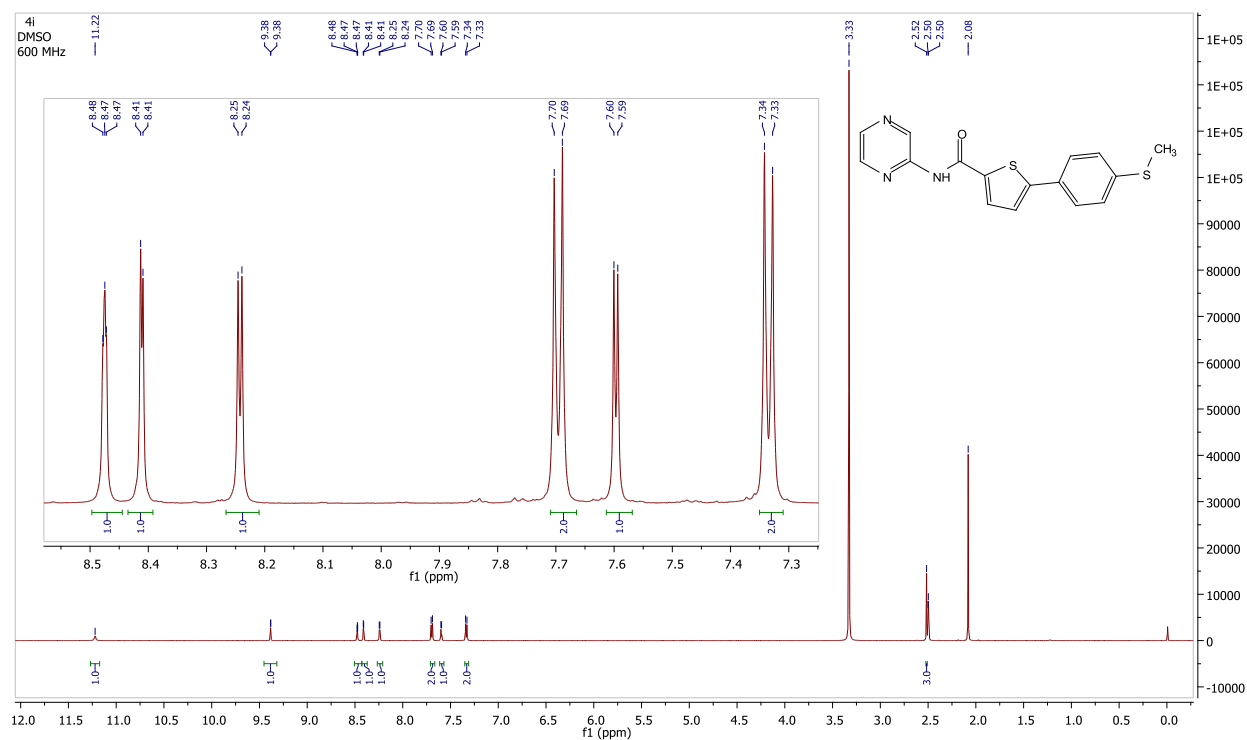

**Figure S12: <sup>1</sup>H NMR (600 MHz, DMSO-d<sub>6</sub>) of compound 4i.**





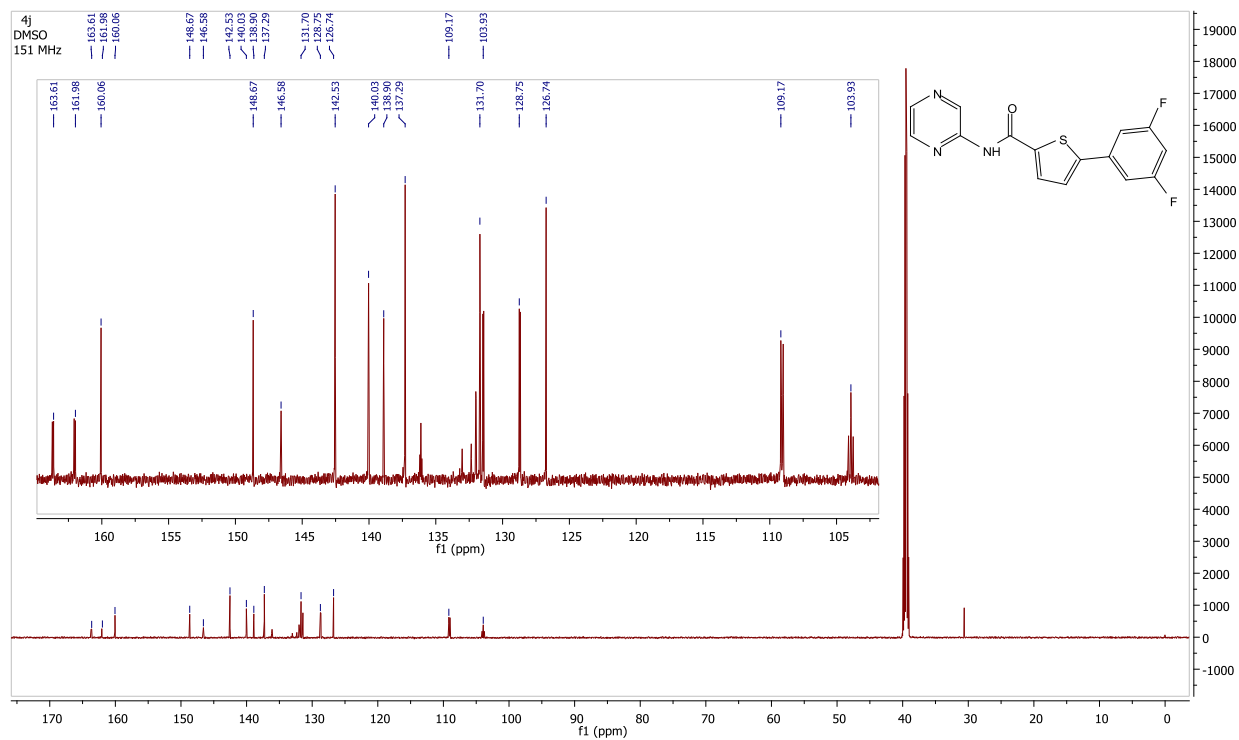

**Figure S15:**  $^{13}\text{C}$  NMR (151 MHz, DMSO- $\text{d}_6$ ) of compound 4j.

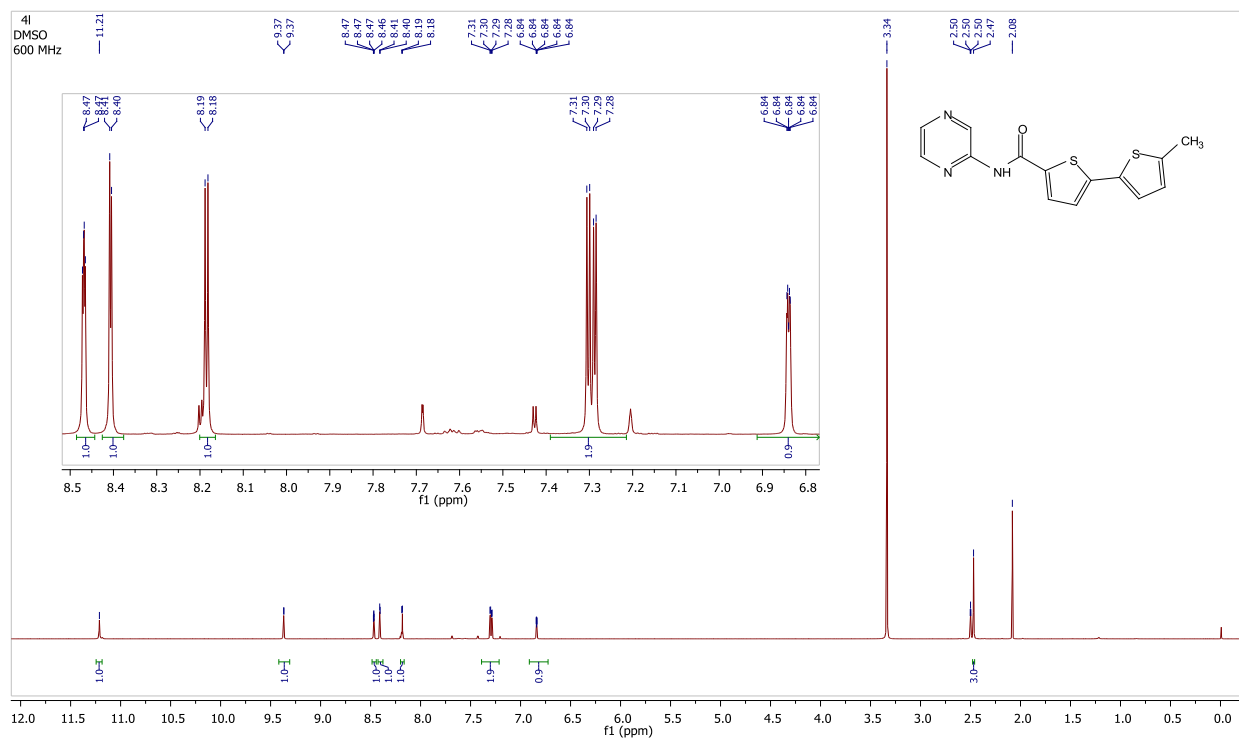

**Figure S16:  $^1\text{H}$  NMR (600 MHz, DMSO- $\text{d}_6$ ) of compound 4l.**



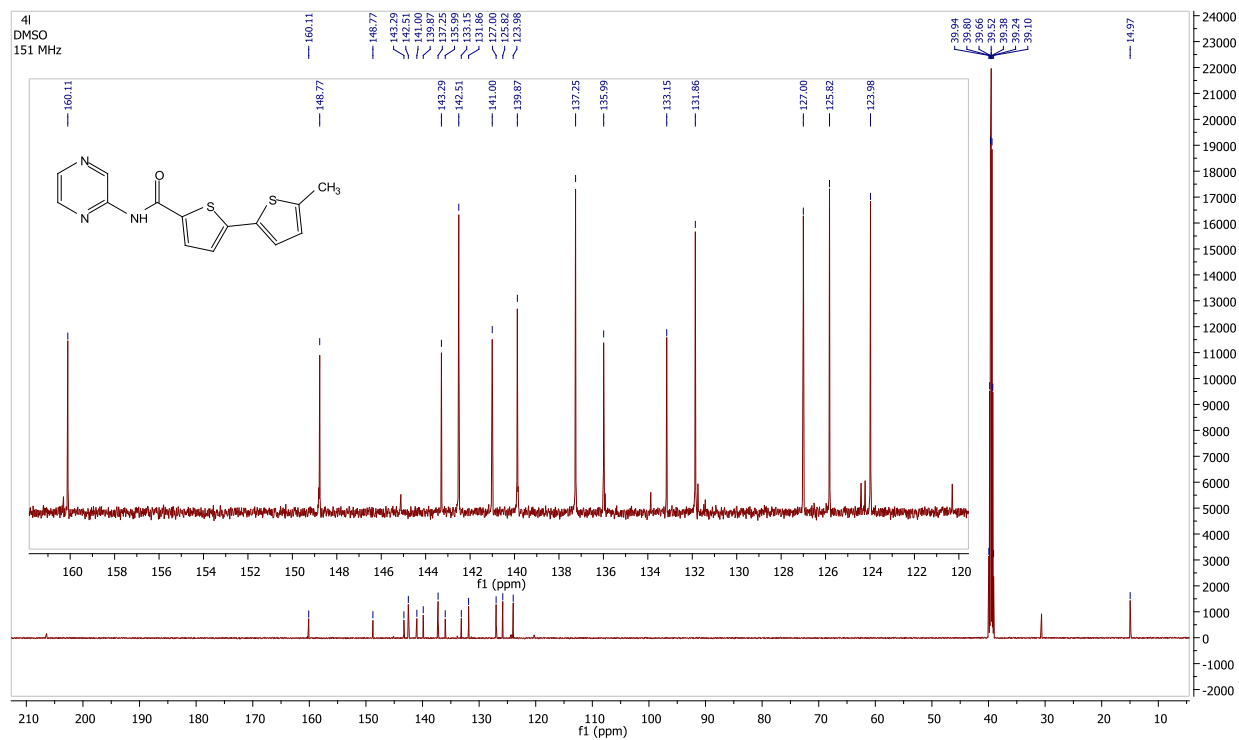

**Figure S17:  $^{13}\text{C}$  NMR (151 MHz, DMSO- $\text{d}_6$ ) of compound 4l.**

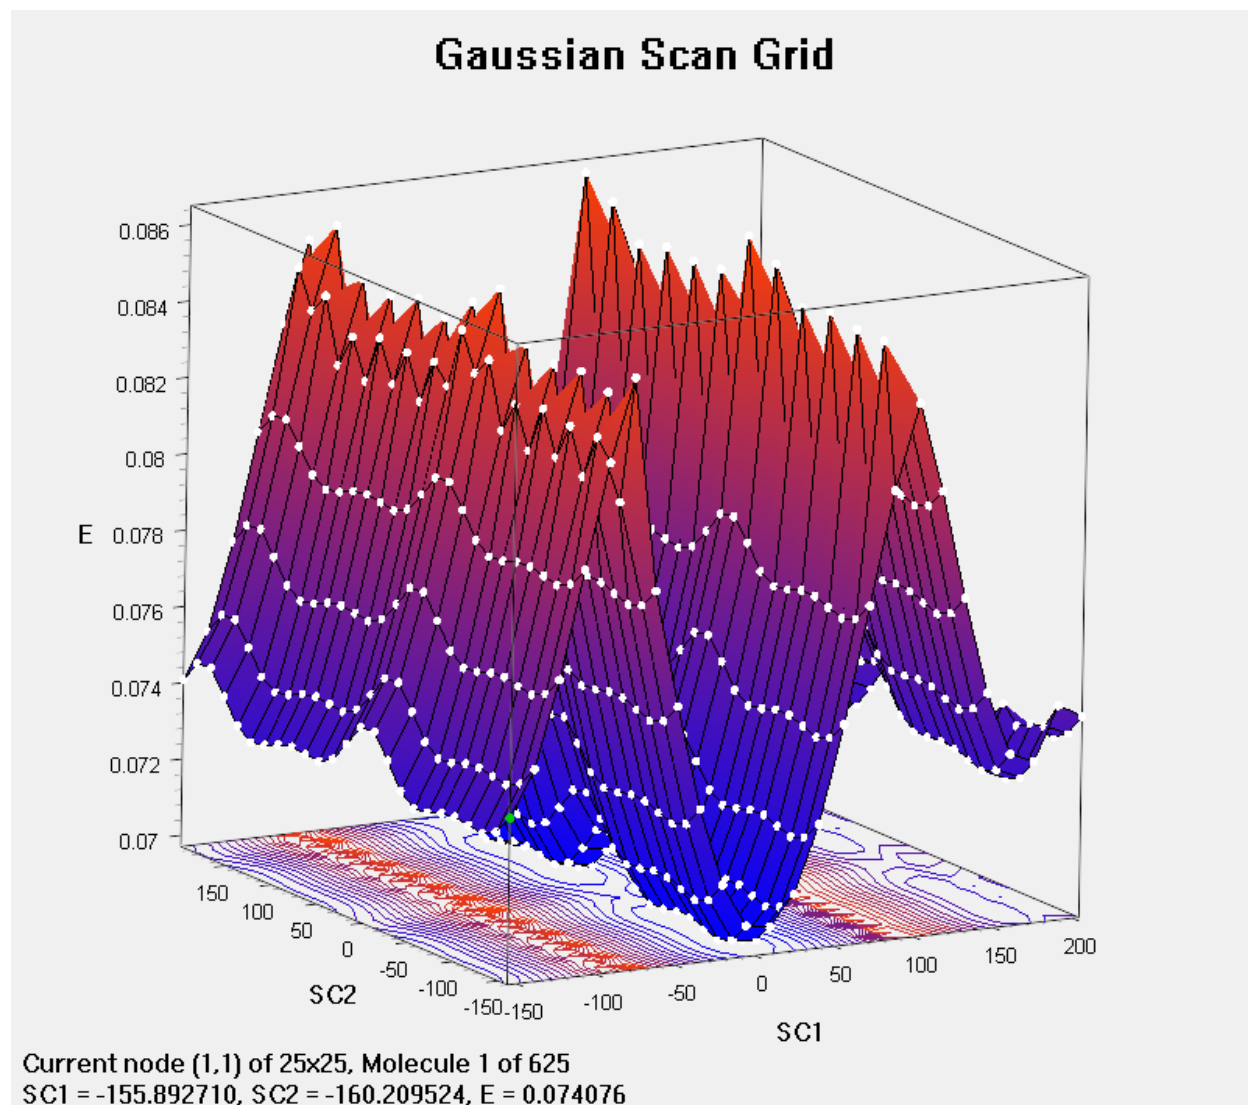

**Figure S18.** Potential Energy Scan of compound 4a at PBE0-D3BJ/def2-SVP/SMD<sub>1,4</sub>-dioxane level of theory

### Gaussian Scan Grid

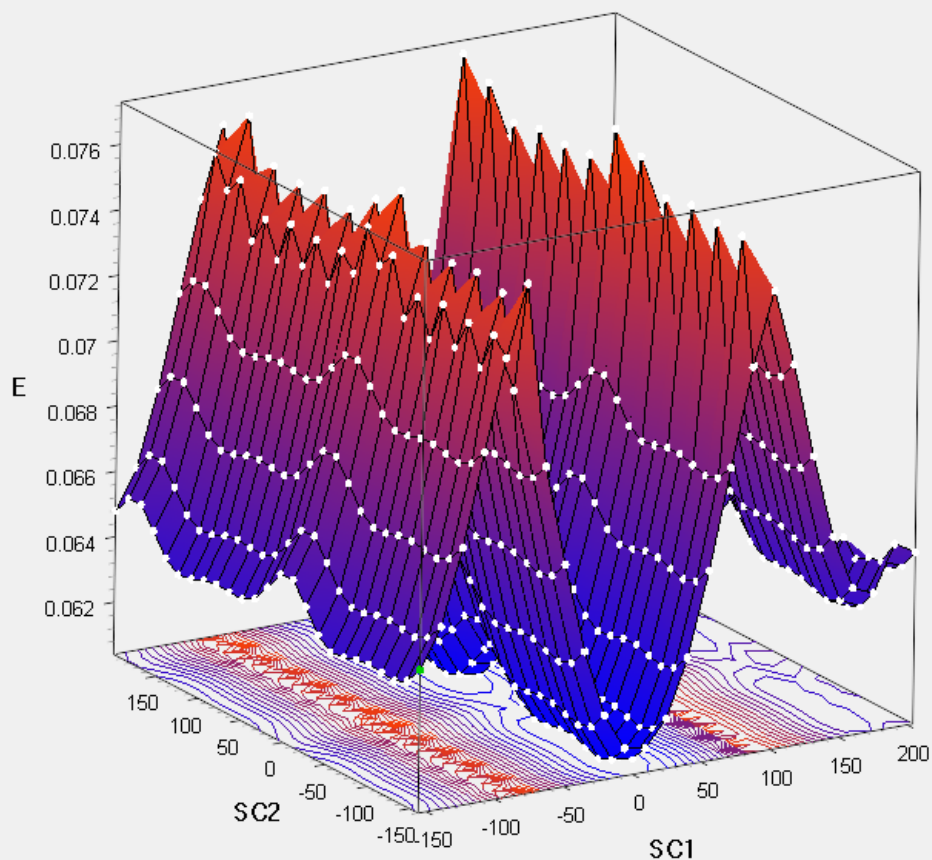

Current node (1,1) of 25x25, Molecule 1 of 625  
SC1 = -155.892645, SC2 = -160.209585, E = 0.064781

**Figure S19.** Potential Energy Scan of compound 4b at PBE0-D3BJ/def2-SVP/SMD<sub>1,4</sub>-dioxane level of theory

## Gaussian Scan Grid

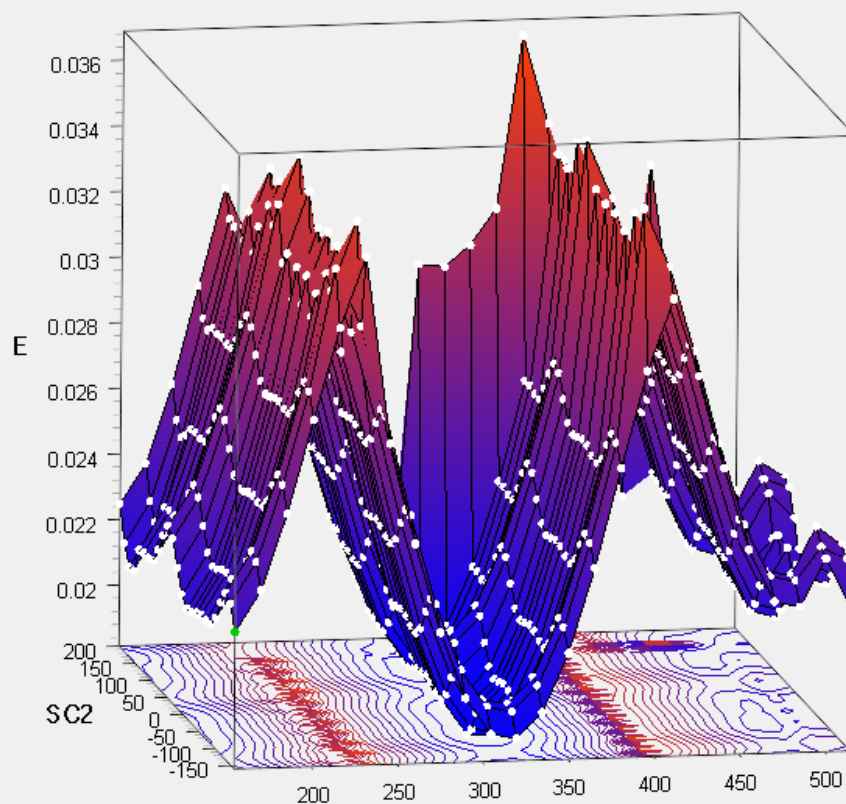

Current node (1,1) of 25x25, Molecule 1 of 625 SC1  
SC1 = 155.109810, SC2 = -159.726732, E = 0.022308

**Figure S20.** Potential Energy Scan of compound 4c at PBE0-D3BJ/def2-SVP/SMD<sub>1,4</sub>-dioxane level of theory

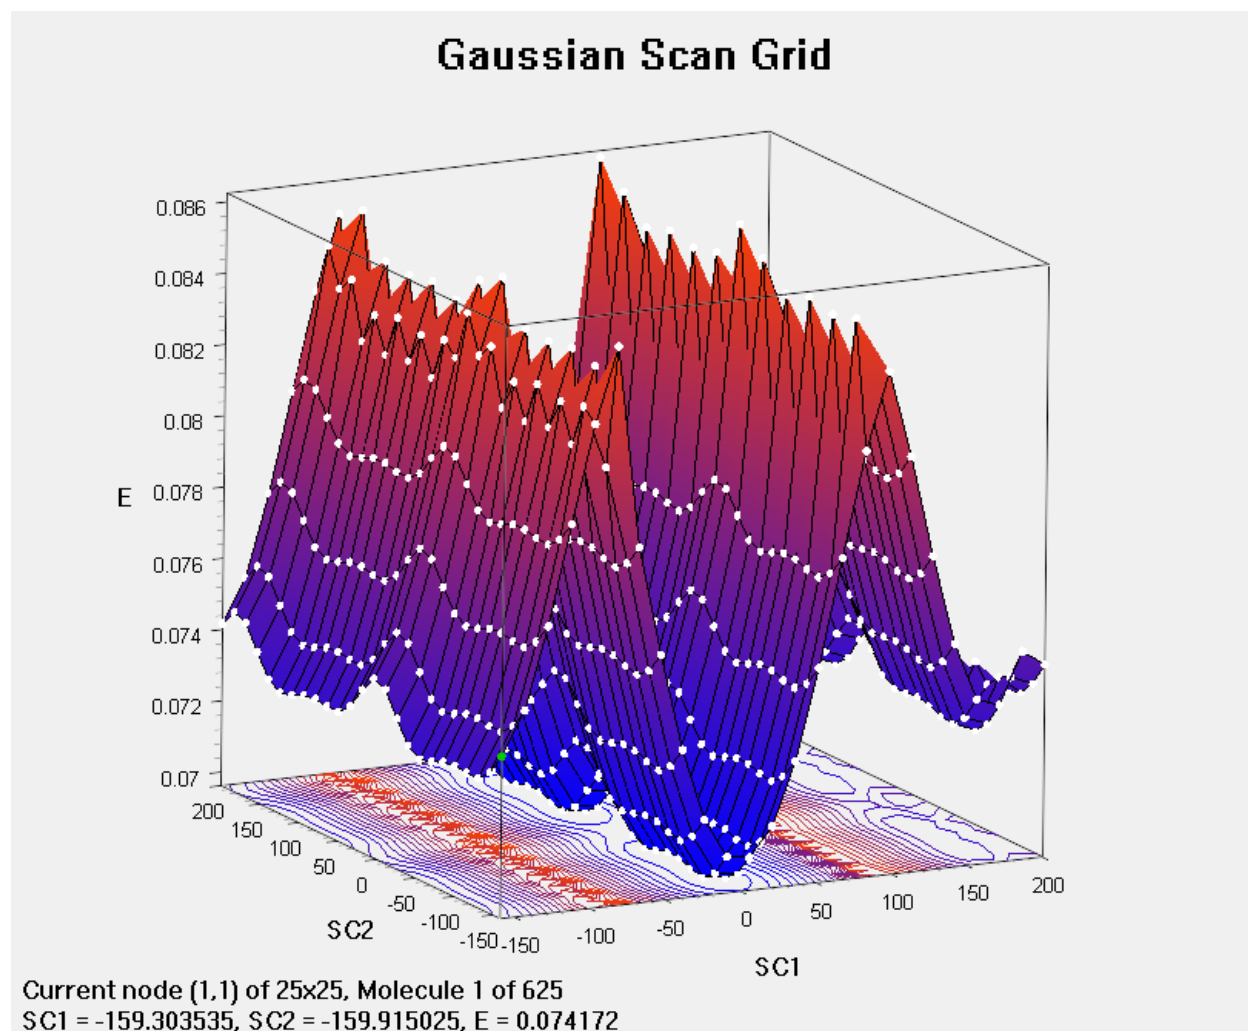

**Figure S21. Potential Energy Scan of compound 4d at PBE0-D3BJ/def2-SVP/SMD<sub>1,4</sub>-dioxane level of theory**

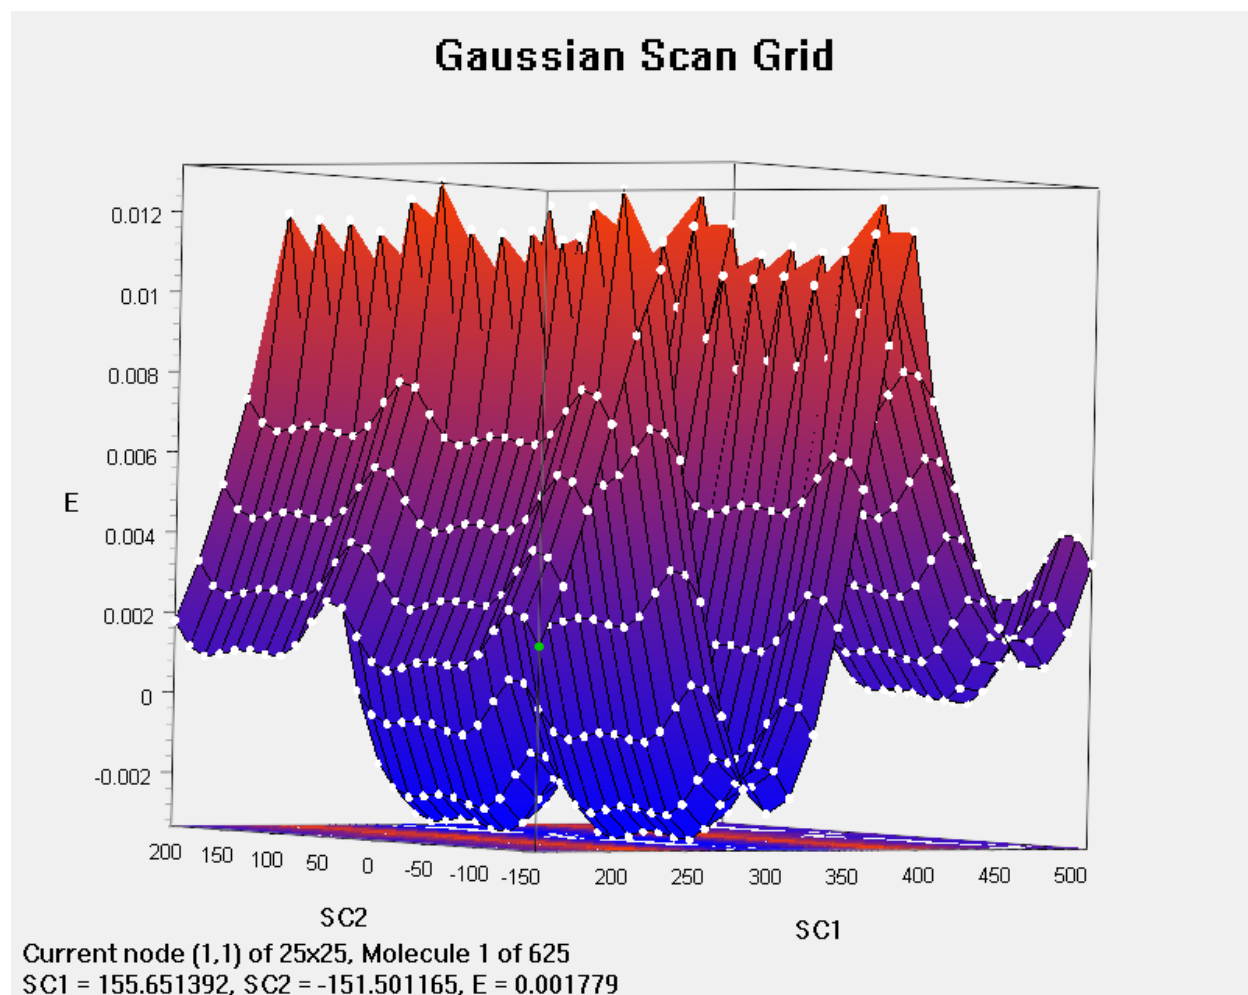

**Figure S22.** Potential Energy Scan of compound 4e at PBE0-D3BJ/def2-SVP/SMD<sub>1,4</sub>-dioxane level of theory

## Gaussian Scan Grid

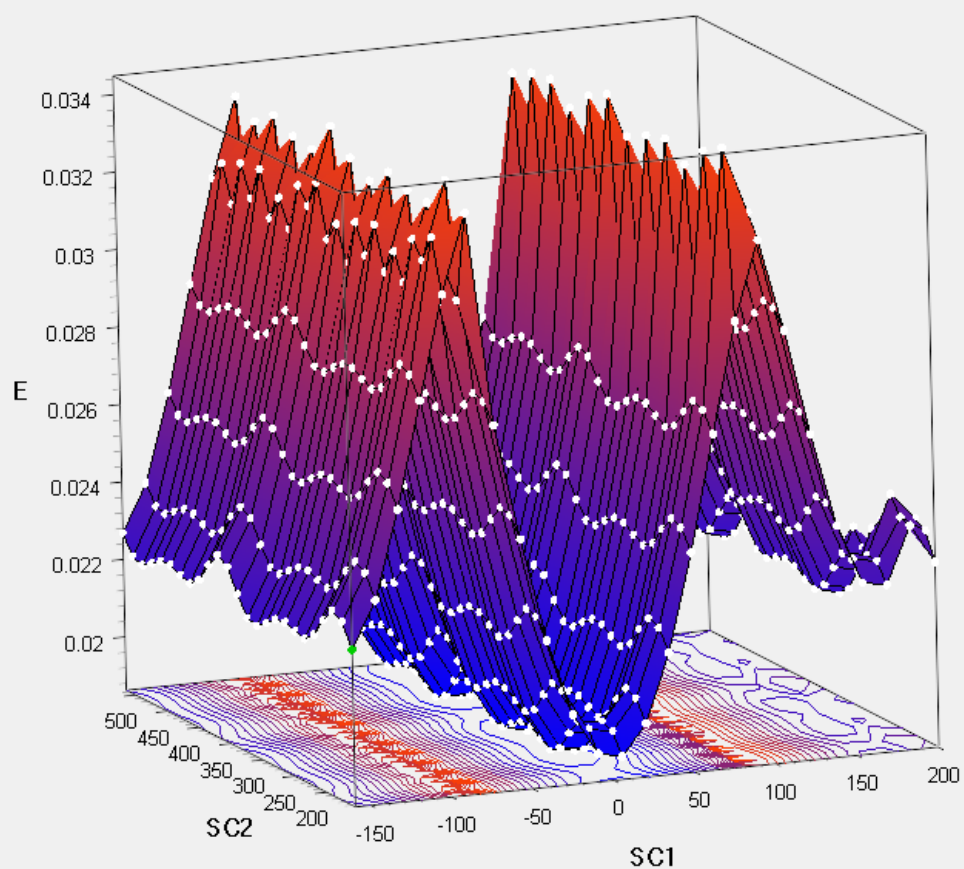

Current node (1,1) of 25x25, Molecule 1 of 625  
 $SC1 = -159.457278$ ,  $SC2 = 154.876605$ ,  $E = 0.022680$

**Figure S23.** Potential Energy Scan of compound **4g** at PBE0-D3BJ/def2-SVP/SMD<sub>1,4</sub>-dioxane level of theory

## Gaussian Scan Grid

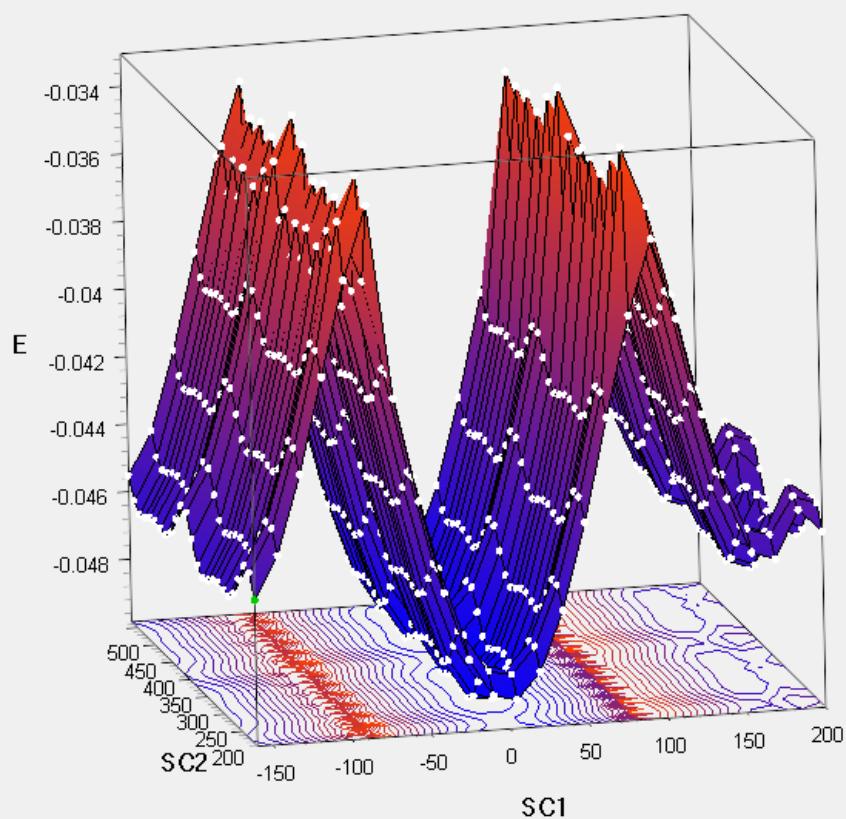

Current node (1,1) of 25x25, Molecule 1 of 625  
SC1 = -159.824799, SC2 = 157.431474, E = -0.045522

**Figure S24. Potential Energy Scan of compound 4h at PBE0-D3BJ/def2-SVP/SMD<sub>1,4</sub>-dioxane level of theory**



## Gaussian Scan Grid

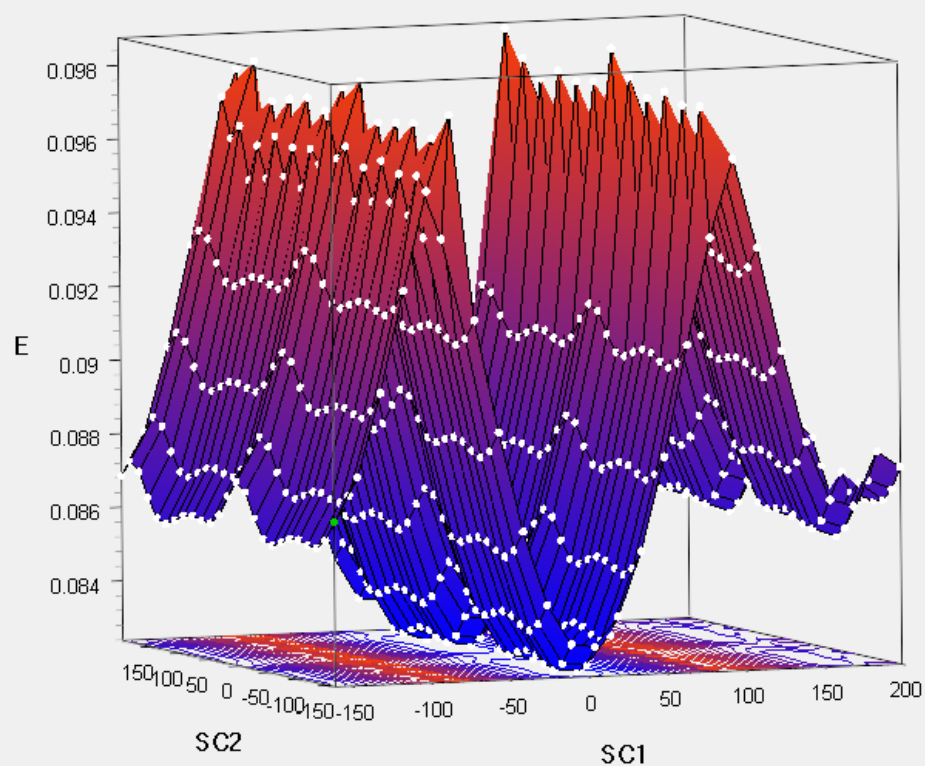

Current node (1,1) of 25x25, Molecule 1 of 625  
 $SC1 = -159.814778$ ,  $SC2 = -160.672505$ ,  $E = 0.086855$

**Figure S25.** Potential Energy Scan of compound **4i** at PBE0-D3BJ/def2-SVP/SMD<sub>1,4</sub>-dioxane level of theory

## Gaussian Scan Grid

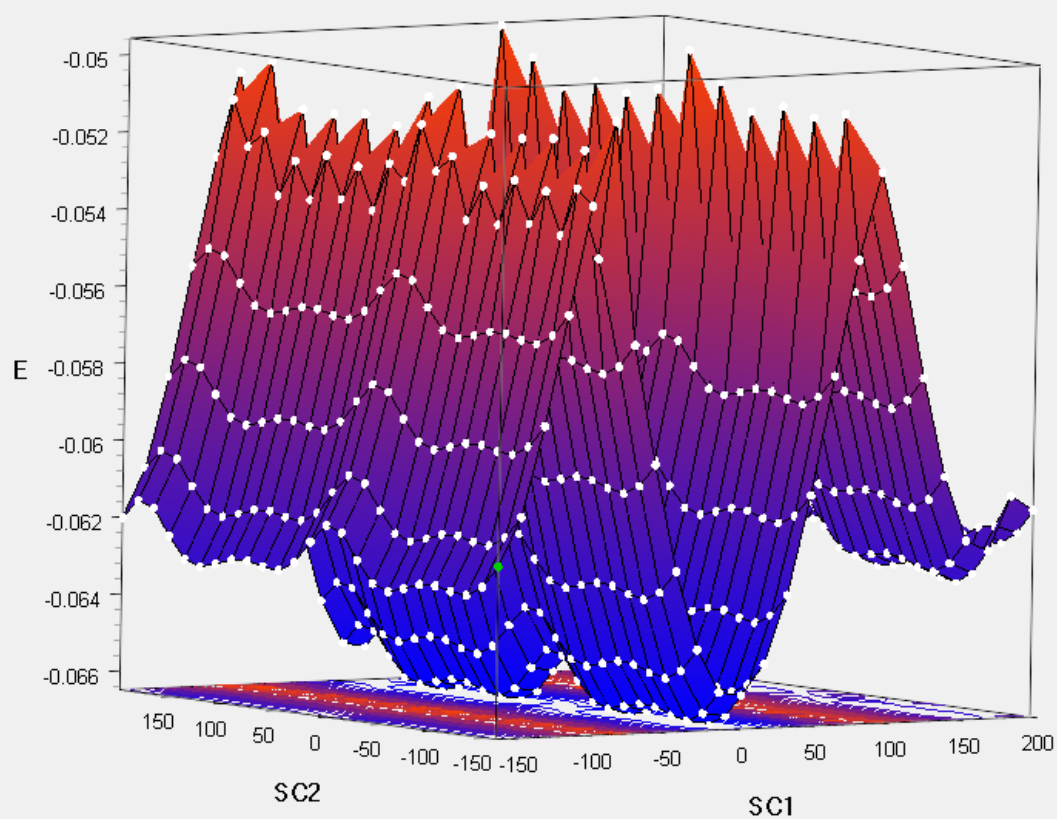

Current node (1,1) of 25x25, Molecule 1 of 625  
 $SC1 = -159.824823$ ,  $SC2 = -160.006917$ ,  $E = -0.062012$

**Figure S26.** Potential Energy Scan of compound **4j** at PBE0-D3BJ/def2-SVP/SMD<sub>1,4</sub>-dioxane level of theory

## Gaussian Scan Grid

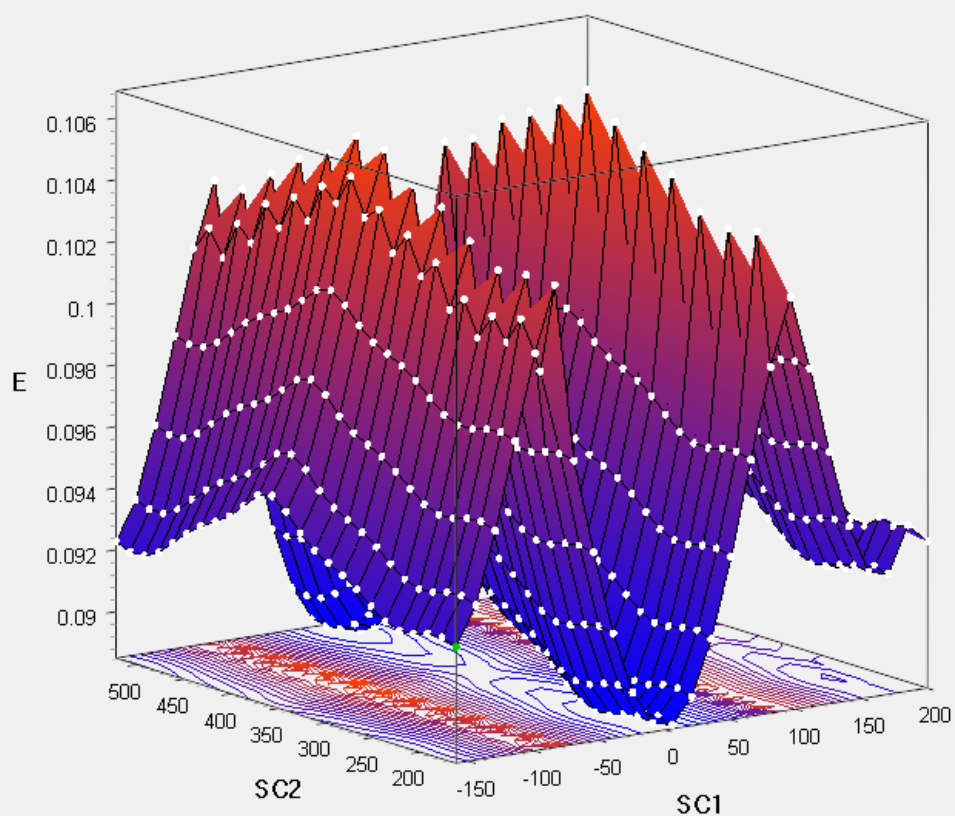

Current node (1,1) of 25x25, Molecule 1 of 625  
 $SC1 = -159.574753$ ,  $SC2 = 162.361016$ ,  $E = 0.092260$

**Figure S27.** Potential Energy Scan of compound 4k at PBE0-D3BJ/def2-SVP/SMD<sub>1,4</sub>-dioxane level of theory

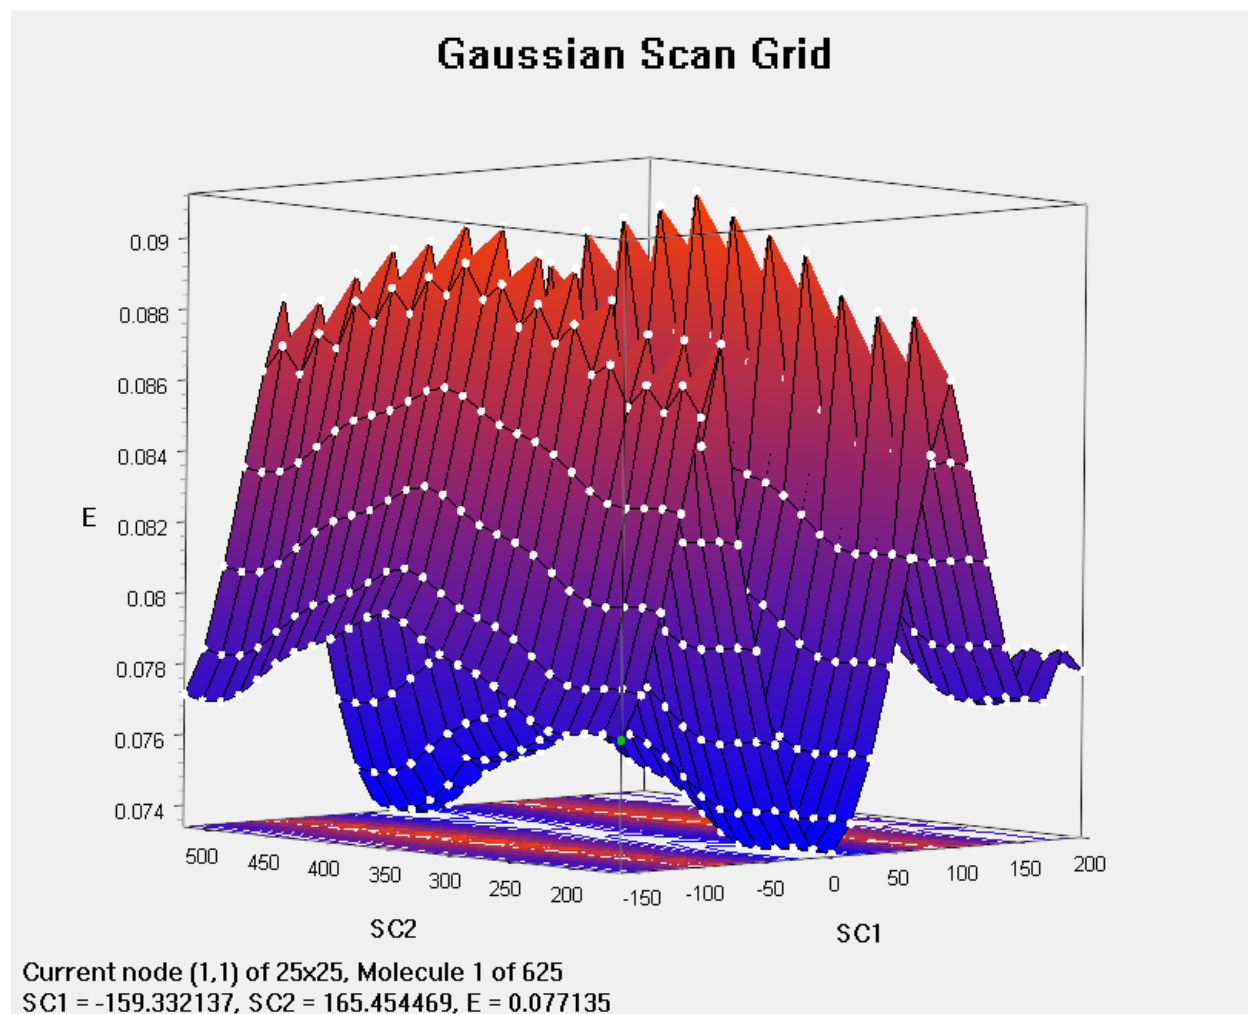

**Figure S28.** Potential Energy Scan of compound 4l at PBE0-D3BJ/def2-SVP/SMD<sub>1,4</sub>-dioxane level of theory

### Gaussian Scan Grid

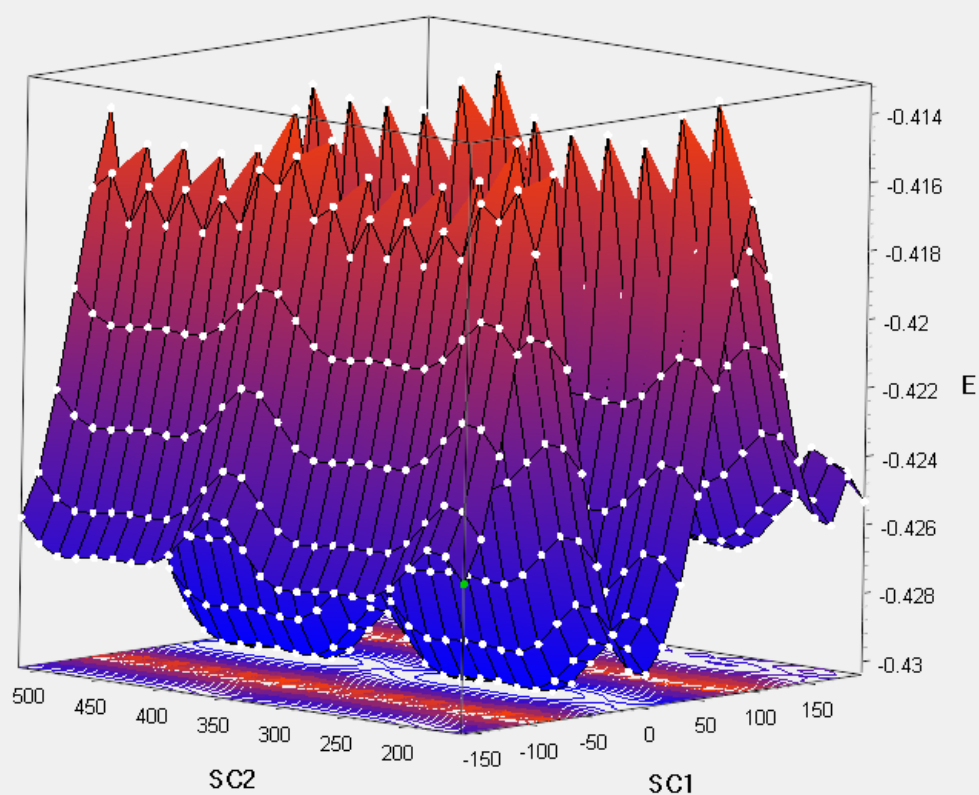

Current node (1,1) of 25x25, Molecule 1 of 625  
 $SC1 = -160.362164$ ,  $SC2 = 156.374438$ ,  $E = -0.426004$

**Figure S29.** Potential Energy Scan of compound **4m** at PBE0-D3BJ/def2-SVP/SMD<sub>1,4</sub>-dioxane level of theory

### Gaussian Scan Grid

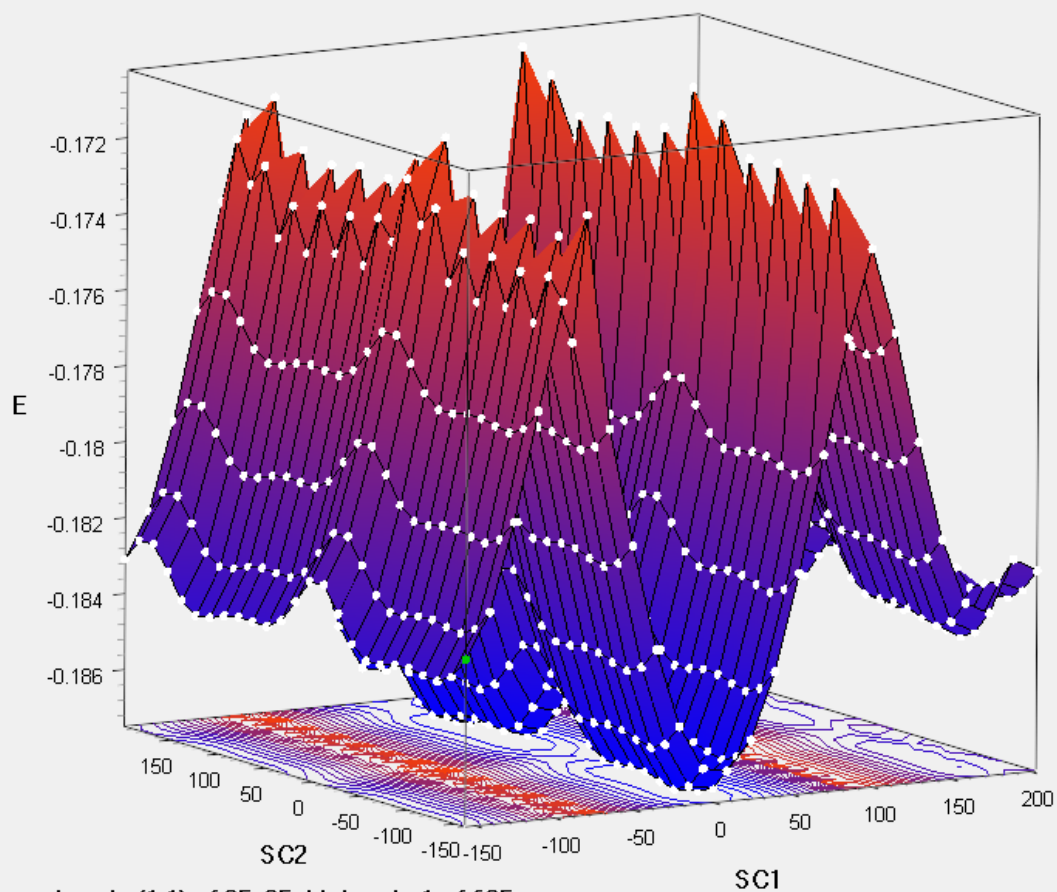

Current node (1,1) of 25x25, Molecule 1 of 625

$SC1 = -156.341115$ ,  $SC2 = -160.580083$ ,  $E = -0.183089$

**Figure S30.** Potential Energy Scan of compound **4n** at PBE0-D3BJ/def2-SVP/SMD<sub>1,4</sub>-dioxane level of theory

### XYZ Coordinates of the lowest energy conformer of 4a

|    |             |             |             |
|----|-------------|-------------|-------------|
| C  | -7.28987900 | 0.01442100  | 0.31517900  |
| C  | -6.78901100 | -0.95755400 | -0.57535100 |
| N  | -5.45757800 | -1.10483500 | -0.78707600 |
| C  | -4.61991300 | -0.26745800 | -0.09564900 |
| C  | -5.13229400 | 0.71916400  | 0.80019700  |
| N  | -6.45852000 | 0.84724400  | 0.99605700  |
| H  | -8.36217500 | 0.13878300  | 0.49304800  |
| H  | -7.44806900 | -1.63246900 | -1.13320800 |
| H  | -4.46285400 | 1.40339200  | 1.35071400  |
| N  | -3.24068400 | -0.48898700 | -0.34170700 |
| H  | -3.03183600 | -1.21801200 | -1.03500200 |
| C  | -2.19033200 | 0.29879700  | 0.19372500  |
| O  | -2.40985200 | 1.27749600  | 0.88202500  |
| C  | -0.83961500 | -0.16462100 | -0.13169100 |
| C  | -0.34996500 | -1.35729800 | -0.60193200 |
| S  | 0.44531100  | 0.95776200  | 0.15773300  |
| C  | 1.07597600  | -1.35589700 | -0.74507300 |
| H  | -0.94647400 | -2.22962000 | -0.84026200 |
| C  | 1.65260700  | -0.16348700 | -0.38201900 |
| H  | 1.62218500  | -2.21524800 | -1.11295300 |
| C  | 3.05666100  | 0.22262000  | -0.38216500 |
| C  | 4.00207600  | -0.60673100 | 0.24690300  |
| C  | 3.47107500  | 1.41368100  | -1.00321000 |
| C  | 5.34142400  | -0.21802500 | 0.23900600  |
| H  | 3.69136700  | -1.52992400 | 0.73698100  |
| C  | 4.82102100  | 1.77660300  | -0.99440400 |
| H  | 2.74325500  | 2.05433100  | -1.50194600 |
| C  | 5.77160400  | 0.96299200  | -0.37130800 |
| H  | 6.82495500  | 1.24258400  | -0.36114400 |
| H  | 5.13608100  | 2.70207100  | -1.47806600 |
| Cl | 6.50566300  | -1.23160300 | 1.00927900  |

### XYZ Coordinates of the lowest energy conformer of 4b

|    |             |             |             |
|----|-------------|-------------|-------------|
| C  | -7.93083700 | -0.05475000 | -0.45525000 |
| C  | -7.40251400 | 1.20925700  | -0.11988200 |
| N  | -6.07344400 | 1.39092500  | 0.07854400  |
| C  | -5.26613300 | 0.29112400  | -0.06150500 |
| C  | -5.80520800 | -0.98555900 | -0.40360400 |
| N  | -7.12907100 | -1.14347400 | -0.59524600 |
| H  | -9.00184200 | -0.21017600 | -0.61636200 |
| H  | -8.03744300 | 2.09527300  | -0.00556500 |
| H  | -5.15916700 | -1.87327500 | -0.52258700 |
| N  | -3.88962200 | 0.54604300  | 0.16871000  |
| H  | -3.65503500 | 1.52252800  | 0.38597900  |
| C  | -2.86150200 | -0.42240200 | 0.06220500  |
| O  | -3.08879300 | -1.56640700 | -0.28305900 |
| C  | -1.51785600 | 0.06327200  | 0.38994100  |
| C  | -1.06744800 | 1.12599300  | 1.13157700  |
| S  | -0.19465200 | -0.87654100 | -0.20878500 |
| C  | 0.36292200  | 1.18686900  | 1.20513000  |
| H  | -1.69608000 | 1.85227700  | 1.63265900  |
| C  | 0.98070700  | 0.16601800  | 0.52549800  |
| H  | 0.88172800  | 1.96026100  | 1.75742200  |
| C  | 2.40014700  | -0.10767500 | 0.35844200  |
| C  | 3.25408200  | 0.91649600  | -0.08838400 |
| C  | 2.91977000  | -1.38462500 | 0.63864200  |
| C  | 4.61376400  | 0.64905300  | -0.25106300 |
| H  | 2.85730600  | 1.90851100  | -0.31272600 |
| C  | 4.28166600  | -1.64387800 | 0.47332700  |
| H  | 2.26178600  | -2.17875800 | 0.99691600  |
| C  | 5.12757700  | -0.62437600 | 0.02719500  |
| H  | 4.68572900  | -2.63463400 | 0.69108600  |
| Cl | 5.66063100  | 1.89041300  | -0.79578500 |
| Cl | 6.79807000  | -0.93449900 | -0.17830100 |



### XYZ Coordinates of the lowest energy conformer of 4c

|   |             |             |             |
|---|-------------|-------------|-------------|
| C | -7.37184300 | 0.78869800  | -0.06218700 |
| C | -7.03238100 | -0.36360700 | 0.67660600  |
| N | -5.74512400 | -0.77230100 | 0.79918000  |
| C | -4.78834800 | -0.01571200 | 0.17209200  |
| C | -5.13677200 | 1.15178300  | -0.57202700 |
| N | -6.42203100 | 1.53913200  | -0.68096000 |
| H | -8.40771800 | 1.12490200  | -0.16678300 |
| H | -7.78776700 | -0.97621600 | 1.18181100  |
| H | -4.36962300 | 1.76764400  | -1.07395600 |
| N | -3.46569200 | -0.50398100 | 0.32771800  |
| H | -3.37687700 | -1.34987400 | 0.90343600  |
| C | -2.30731500 | 0.12792000  | -0.18807400 |
| O | -2.36970700 | 1.17695300  | -0.80265300 |
| C | -1.04558600 | -0.57237100 | 0.05773100  |
| C | -0.72950800 | -1.77252100 | 0.64247500  |
| S | 0.38204800  | 0.23450300  | -0.50093300 |
| C | 0.67905700  | -2.03742800 | 0.64756400  |
| H | -1.44080600 | -2.47156000 | 1.06526900  |
| C | 1.41868100  | -1.03641000 | 0.06761200  |
| H | 1.09660000  | -2.93656700 | 1.08206800  |
| C | 2.85740700  | -0.93368500 | -0.12072700 |
| C | 3.56832100  | -2.00932300 | -0.68495800 |
| C | 3.54169500  | 0.23336000  | 0.25762800  |
| C | 4.94914700  | -1.91619700 | -0.86491700 |
| H | 3.03642500  | -2.91270200 | -0.98518500 |
| C | 4.92510600  | 0.32244500  | 0.06993200  |
| H | 2.99427500  | 1.06068100  | 0.71151600  |
| C | 5.62991900  | -0.75639400 | -0.48448300 |
| H | 5.49913100  | -2.75092300 | -1.29958200 |
| H | 6.71432400  | -0.68368200 | -0.60831000 |
| C | 5.70009800  | 1.54673600  | 0.46575700  |
| O | 6.86247300  | 1.46701700  | 0.79799600  |
| C | 4.98081100  | 2.86182400  | 0.40691800  |
| H | 4.39148800  | 2.97987400  | -0.51136400 |
| H | 4.30024100  | 2.98961700  | 1.26003700  |
| H | 5.69441300  | 3.70035100  | 0.45001700  |

### XYZ Coordinates of the lowest energy conformer of 4d

|   |             |             |             |
|---|-------------|-------------|-------------|
| C | -7.38336100 | -0.41920600 | 0.01334300  |
| C | -6.92486000 | 0.79754000  | 0.55908800  |
| N | -5.60253100 | 1.09247900  | 0.62045400  |
| C | -4.73111700 | 0.15526200  | 0.12722300  |
| C | -5.20015200 | -1.07779100 | -0.41891100 |
| N | -6.51811800 | -1.34940100 | -0.47094400 |
| H | -8.44816000 | -0.66432800 | -0.04145200 |
| H | -7.61111100 | 1.55413600  | 0.95616600  |
| H | -4.50231600 | -1.84043900 | -0.80723900 |
| N | -3.36608500 | 0.53357300  | 0.19823300  |
| H | -3.18631400 | 1.44098900  | 0.64554000  |
| C | -2.27916800 | -0.29508900 | -0.18046600 |
| O | -2.44670500 | -1.43968500 | -0.55619300 |
| C | -0.96107600 | 0.33736300  | -0.09478500 |
| C | -0.55855900 | 1.64810100  | -0.04340800 |
| S | 0.40438000  | -0.72635800 | -0.10689700 |
| C | 0.86665800  | 1.79189400  | 0.00542300  |
| H | -1.21891900 | 2.50689400  | -0.04757300 |
| C | 1.53056000  | 0.59012300  | -0.01019600 |
| H | 1.34946500  | 2.75907800  | 0.05937800  |
| C | 2.96012900  | 0.32114100  | 0.02177900  |
| C | 3.50007500  | -0.55098000 | 0.98390400  |
| C | 3.80557500  | 0.93978000  | -0.91814400 |
| C | 4.87254000  | -0.80662500 | 1.00785000  |
| H | 2.85122200  | -1.02549900 | 1.72174900  |
| C | 5.17808800  | 0.68817800  | -0.90203000 |
| H | 3.38495500  | 1.61287200  | -1.66622400 |
| C | 5.69089100  | -0.18298800 | 0.06288100  |
| H | 5.29752900  | -1.48130500 | 1.75178800  |

### XYZ Coordinates of the lowest energy conformer of 4e

|    |             |             |             |
|----|-------------|-------------|-------------|
| C  | 7.59458400  | 0.01418600  | -0.44930700 |
| C  | 7.06129800  | 1.25243200  | -0.03510100 |
| N  | 5.73150500  | 1.41602000  | 0.17405600  |
| C  | 4.92846500  | 0.32415400  | -0.03555400 |
| C  | 5.47281800  | -0.92682500 | -0.45554600 |
| N  | 6.79721800  | -1.06702100 | -0.65675400 |
| H  | 8.66611800  | -0.12645500 | -0.62010000 |
| H  | 7.69274200  | 2.13190700  | 0.13519600  |
| H  | 4.83048900  | -1.80862700 | -0.62748400 |
| N  | 3.55019200  | 0.56081900  | 0.20317300  |
| H  | 3.31316800  | 1.51894400  | 0.48808900  |
| C  | 2.52797200  | -0.40798000 | 0.05392000  |
| O  | 2.76535000  | -1.53908300 | -0.32645700 |
| C  | 1.17642900  | 0.05857100  | 0.37483100  |
| C  | 0.70136600  | 1.12751400  | 1.09164600  |
| S  | -0.12584800 | -0.92037900 | -0.20898000 |
| C  | -0.73003200 | 1.15973100  | 1.16112200  |
| H  | 1.31238200  | 1.87912100  | 1.57674000  |
| C  | -1.32486800 | 0.11165500  | 0.50275700  |
| H  | -1.26595700 | 1.93367800  | 1.69578200  |
| C  | -2.73716600 | -0.19579400 | 0.33803700  |
| C  | -3.22776500 | -1.47865000 | 0.64289900  |
| C  | -3.61080400 | 0.80536400  | -0.12812600 |
| C  | -4.58328900 | -1.77886600 | 0.48467500  |
| H  | -2.54998500 | -2.24972300 | 1.01599800  |
| C  | -4.96330300 | 0.50957100  | -0.28720500 |
| H  | -3.23264400 | 1.80079700  | -0.36958400 |
| C  | -5.43424700 | -0.77544300 | 0.01905800  |
| H  | -4.96363700 | -2.77371400 | 0.72112700  |
| F  | -6.72991600 | -1.02257900 | -0.14446500 |
| Cl | -6.05904800 | 1.69232700  | -0.85130600 |

### XYZ Coordinates of the lowest energy conformer of 4f

|   |             |             |             |
|---|-------------|-------------|-------------|
| C | -7.24929900 | 0.29340200  | 0.03011500  |
| C | -6.77378100 | -0.98958100 | 0.36967300  |
| N | -5.44673600 | -1.26878700 | 0.39878900  |
| C | -4.58742200 | -0.24735900 | 0.08287400  |
| C | -5.07469200 | 1.05145800  | -0.25776300 |
| N | -6.39643300 | 1.30596500  | -0.28098800 |
| H | -8.31757900 | 0.52669200  | 0.00352500  |
| H | -7.44967500 | -1.81373500 | 0.62403600  |
| H | -4.38658200 | 1.87842600  | -0.50773100 |
| N | -3.21669400 | -0.60516000 | 0.12063900  |
| H | -3.02433700 | -1.57445600 | 0.40095000  |
| C | -2.14092500 | 0.28354700  | -0.13798600 |
| O | -2.33165300 | 1.45989300  | -0.38417400 |
| C | -0.80967200 | -0.31957000 | -0.08371000 |
| C | -0.36842800 | -1.61995900 | -0.07483400 |
| S | 0.52581400  | 0.77747000  | -0.05848700 |
| C | 1.05742300  | -1.72288500 | -0.03455300 |
| H | -1.00340000 | -2.49680100 | -0.10342700 |
| C | 1.69758100  | -0.50340700 | -0.01299800 |
| H | 1.56212900  | -2.68025500 | -0.01921500 |
| C | 3.12386400  | -0.20846700 | 0.01920800  |
| C | 4.05146100  | -1.25894300 | -0.09396600 |
| C | 3.58386100  | 1.11197200  | 0.15237100  |
| C | 5.42768000  | -0.99316600 | -0.07271200 |
| H | 3.70293400  | -2.28326700 | -0.20185600 |
| C | 4.96083900  | 1.37963400  | 0.17276000  |
| H | 2.88761300  | 1.94322200  | 0.24630600  |
| C | 5.88019400  | 0.32709300  | 0.06051000  |
| C | 5.45363800  | 2.78338900  | 0.31379300  |
| H | 6.07560600  | 2.90010800  | 1.21324200  |
| H | 6.06927800  | 3.07907000  | -0.54829300 |
| H | 4.63975600  | 3.51643200  | 0.39090100  |
| C | 6.41506500  | -2.10860500 | -0.19262500 |
| H | 7.05709500  | -1.97919700 | -1.07628200 |
| H | 7.07594600  | -2.15284700 | 0.68534600  |
| H | 5.93873300  | -3.09310200 | -0.28475500 |
| H | 6.94740800  | 0.53560700  | 0.07640800  |

### XYZ Coordinates of the lowest energy conformer of 4g

|   |             |             |             |
|---|-------------|-------------|-------------|
| C | 7.38318200  | -0.43146000 | -0.22236700 |
| C | 6.93254400  | 0.90342500  | -0.27027600 |
| N | 5.61291600  | 1.20910600  | -0.19876400 |
| C | 4.73574400  | 0.16159600  | -0.07705200 |
| C | 5.19772700  | -1.18952300 | -0.03481300 |
| N | 6.51248000  | -1.46970500 | -0.10602400 |
| H | 8.44534400  | -0.68641300 | -0.27780700 |
| H | 7.62276600  | 1.74894000  | -0.36743600 |
| H | 4.49487100  | -2.03676600 | 0.05223800  |
| N | 3.37508800  | 0.54613000  | 0.01553900  |
| H | 3.19855600  | 1.55551500  | -0.06119700 |
| C | 2.28121500  | -0.35769100 | 0.08392600  |
| O | 2.44362500  | -1.56062100 | 0.01098800  |
| C | 0.97451000  | 0.27655200  | 0.25436100  |
| C | 0.59310700  | 1.49315900  | 0.76132900  |
| S | -0.40983600 | -0.65872400 | -0.20294000 |
| C | -0.82804600 | 1.67467900  | 0.77285000  |
| H | 1.26817300  | 2.25258200  | 1.13715400  |
| C | -1.51692600 | 0.59346900  | 0.28089500  |
| H | -1.29229000 | 2.57551400  | 1.15157400  |
| C | -2.94377900 | 0.39224700  | 0.11537400  |
| C | -3.56273900 | -0.77948000 | 0.57905000  |
| C | -3.72107100 | 1.38753100  | -0.51946400 |
| C | -4.93608800 | -0.97421000 | 0.41709300  |
| H | -2.97263800 | -1.54871700 | 1.08162300  |
| C | -5.08525600 | 1.21356900  | -0.69257900 |
| H | -3.23796600 | 2.29655800  | -0.88154700 |
| C | -5.68443900 | 0.02444000  | -0.21925600 |
| H | -5.70237000 | 1.96447200  | -1.18195500 |
| H | -5.39797800 | -1.88518200 | 0.78319200  |
| O | -7.03630000 | -0.01444300 | -0.45577700 |
| C | -7.77196600 | -1.18648500 | -0.02539700 |
| H | -7.71695500 | -1.29260100 | 1.06171800  |
| H | -8.79289800 | -0.93635400 | -0.34423200 |
| H | -7.40753300 | -2.07708400 | -0.54528600 |

### XYZ Coordinates of the lowest energy conformer of 4h

|   |             |             |             |
|---|-------------|-------------|-------------|
| C | 8.06698400  | -0.51469800 | -0.30128900 |
| C | 7.63955800  | 0.82911300  | -0.27783600 |
| N | 6.32679500  | 1.15275600  | -0.17351200 |
| C | 5.43356800  | 0.11535000  | -0.09107300 |
| C | 5.87066600  | -1.24331100 | -0.12117700 |
| N | 7.17998800  | -1.54194000 | -0.22398500 |
| H | 9.12410300  | -0.78450900 | -0.38360700 |
| H | 8.34366100  | 1.66646500  | -0.34309700 |
| H | 5.15502900  | -2.08240300 | -0.06621300 |
| N | 4.08021800  | 0.52013100  | 0.03980500  |
| H | 3.92232400  | 1.53538100  | 0.01430100  |
| C | 2.97403900  | -0.36565800 | 0.07304900  |
| O | 3.10758600  | -1.56645400 | -0.06435000 |
| C | 1.67695400  | 0.28004200  | 0.29460800  |
| C | 1.32318800  | 1.47097600  | 0.87720100  |
| S | 0.27615900  | -0.60416900 | -0.20178400 |
| C | -0.09532500 | 1.67574600  | 0.90644200  |
| H | 2.01420200  | 2.19438600  | 1.29316100  |
| C | -0.80073800 | 0.63517500  | 0.35402200  |
| H | -0.54407600 | 2.56219200  | 1.33666800  |
| C | -2.23982300 | 0.47703900  | 0.19108400  |
| C | -2.88501900 | -0.68225100 | 0.65500200  |
| C | -2.98400300 | 1.49303900  | -0.43610800 |
| C | -4.26323300 | -0.82553100 | 0.49030800  |
| H | -2.31586400 | -1.46812300 | 1.15302600  |
| C | -4.36062500 | 1.34808600  | -0.60085700 |
| H | -2.48225500 | 2.38996500  | -0.79928200 |
| C | -5.00176800 | 0.18770500  | -0.13758900 |
| H | -4.94788100 | 2.13179900  | -1.08951400 |
| H | -4.77380800 | -1.72461900 | 0.84890800  |
| C | -6.46775400 | 0.07211000  | -0.33163600 |
| O | -7.22239800 | 0.86731700  | -0.84318900 |
| O | -6.92164600 | -1.12983200 | 0.17335700  |
| C | -8.34531200 | -1.39135000 | 0.04779200  |
| H | -8.46303500 | -2.32690100 | 0.60457700  |
| H | -8.91752800 | -0.57225200 | 0.49563400  |
| H | -8.59890500 | -1.50902900 | -1.01038900 |

### XYZ Coordinates of the lowest energy conformer of 4i

|   |             |             |             |
|---|-------------|-------------|-------------|
| C | -7.75344000 | -0.55599100 | 0.02078000  |
| C | -7.31930000 | 0.59109500  | 0.71612800  |
| N | -6.00448900 | 0.91350200  | 0.80001500  |
| C | -5.11573500 | 0.07467800  | 0.17730400  |
| C | -5.56050900 | -1.08927500 | -0.52071700 |
| N | -6.87102900 | -1.38953900 | -0.59214400 |
| H | -8.81180900 | -0.82233700 | -0.05306900 |
| H | -8.01920300 | 1.26908400  | 1.21745700  |
| H | -4.84819600 | -1.77368600 | -1.01435700 |
| N | -3.76087600 | 0.47869400  | 0.28075400  |
| H | -3.59806300 | 1.32484900  | 0.84035800  |
| C | -2.65706600 | -0.26166600 | -0.21755600 |
| O | -2.80243100 | -1.35110900 | -0.73864400 |
| C | -1.35637700 | 0.39108300  | -0.06531100 |
| C | -0.98788700 | 1.69104500  | 0.17471800  |
| S | 0.03786500  | -0.61684800 | -0.26236600 |
| C | 0.43329200  | 1.86923400  | 0.21862400  |
| H | -1.67104800 | 2.52034100  | 0.31220900  |
| C | 1.13010300  | 0.70487000  | 0.00986900  |
| H | 0.89147600  | 2.83131100  | 0.40756300  |
| C | 2.56606600  | 0.47564500  | -0.02187800 |
| C | 3.15716700  | -0.47838400 | 0.82123500  |
| C | 3.37223000  | 1.22101900  | -0.90458600 |
| C | 4.53877100  | -0.69106000 | 0.78338700  |
| H | 2.54361800  | -1.05262500 | 1.51608000  |
| C | 4.74829800  | 1.00800600  | -0.94628000 |
| H | 2.91403500  | 1.96088400  | -1.56124800 |
| C | 5.32464500  | 0.04996400  | -0.09907400 |
| H | 5.36484000  | 1.58570900  | -1.63711700 |
| H | 4.97753800  | -1.43332400 | 1.44776200  |
| S | 7.06609800  | -0.10840800 | -0.24512100 |
| C | 7.54894900  | -1.46191000 | 0.84257300  |
| H | 7.07341300  | -2.41047500 | 0.56763800  |
| H | 8.63660900  | -1.58883200 | 0.73297400  |
| H | 7.34235200  | -1.24663800 | 1.89703500  |

### XYZ Coordinates of the lowest energy conformer of 4j

|   |             |             |             |
|---|-------------|-------------|-------------|
| C | -7.21953900 | 0.28941700  | 0.14729800  |
| C | -6.73913300 | -0.55489800 | -0.87533700 |
| N | -5.41180200 | -0.77050700 | -1.04992600 |
| C | -4.55780800 | -0.13204700 | -0.18751200 |
| C | -5.04836400 | 0.72616500  | 0.84210700  |
| N | -6.37142800 | 0.92516600  | 0.99826700  |
| H | -8.28881900 | 0.46760000  | 0.29616400  |
| H | -7.41176700 | -1.07040800 | -1.57037400 |
| H | -4.36491400 | 1.25142300  | 1.53226000  |
| N | -3.18554400 | -0.41852100 | -0.40802200 |
| H | -2.99005100 | -1.03274600 | -1.20842800 |
| C | -2.11523900 | 0.17707500  | 0.30378800  |
| O | -2.29992800 | 1.03697200  | 1.14377800  |
| C | -0.78396200 | -0.33140200 | -0.04179600 |
| C | -0.35921700 | -1.49037800 | -0.64179800 |
| S | 0.55925300  | 0.65452000  | 0.41909500  |
| C | 1.06829300  | -1.57237900 | -0.74143500 |
| H | -1.00400200 | -2.28309900 | -1.00177300 |
| C | 1.70649500  | -0.47534900 | -0.21653900 |
| H | 1.57124600  | -2.41772100 | -1.19446200 |
| C | 3.13512900  | -0.19543500 | -0.13276000 |
| C | 3.98521000  | -1.12789200 | 0.48679600  |
| C | 3.65250700  | 0.99671800  | -0.66594300 |
| C | 5.34965600  | -0.83564600 | 0.55911400  |
| H | 3.58201600  | -2.05006400 | 0.90586700  |
| C | 5.02738900  | 1.22714100  | -0.56063500 |
| H | 3.00027600  | 1.71904700  | -1.15835200 |
| C | 5.91523500  | 0.33510700  | 0.04641500  |
| H | 6.98378000  | 0.53999700  | 0.11633100  |
| F | 5.51832900  | 2.35608400  | -1.06713400 |
| F | 6.15446200  | -1.71855900 | 1.14649100  |



### XYZ Coordinates of the lowest energy conformer of 4k

|    |             |             |             |
|----|-------------|-------------|-------------|
| C  | -7.35705400 | 0.01995400  | -0.32814700 |
| C  | -6.78106200 | -1.26728900 | -0.32492100 |
| N  | -5.44109600 | -1.44318900 | -0.21230300 |
| C  | -4.67116400 | -0.31368800 | -0.10092900 |
| C  | -5.25863300 | 0.98753400  | -0.11045300 |
| N  | -6.59220000 | 1.13887200  | -0.22203300 |
| H  | -8.43701700 | 0.17066400  | -0.41702600 |
| H  | -7.38560500 | -2.17713000 | -0.41332500 |
| H  | -4.64252700 | 1.90050100  | -0.03180400 |
| N  | -3.28216600 | -0.56581700 | 0.03645800  |
| H  | -3.01044500 | -1.55605300 | -0.00587800 |
| C  | -2.28314900 | 0.43830300  | 0.10080400  |
| O  | -2.55143400 | 1.61901300  | -0.01256400 |
| C  | -0.92339100 | -0.06072900 | 0.32151600  |
| C  | -0.44070200 | -1.22327200 | 0.86879700  |
| S  | 0.36983300  | 0.99692700  | -0.12190100 |
| C  | 0.98981400  | -1.26463200 | 0.92043200  |
| H  | -1.04935300 | -2.03646300 | 1.24632000  |
| C  | 1.58156100  | -0.13046900 | 0.41465600  |
| H  | 1.52747500  | -2.10903900 | 1.33393600  |
| C  | 2.96400600  | 0.20567500  | 0.28508300  |
| C  | 3.61838000  | 1.38248500  | 0.53255100  |
| S  | 4.08894400  | -1.01236900 | -0.27947100 |
| C  | 5.03362700  | 1.31938900  | 0.27237800  |
| H  | 3.14961700  | 2.28851700  | 0.89940300  |
| C  | 5.43559800  | 0.09369300  | -0.16938600 |
| H  | 5.68672900  | 2.17056500  | 0.42208300  |
| Cl | 6.99961300  | -0.37572800 | -0.57767000 |

### XYZ Coordinates of the lowest energy conformer of 4l

|   |             |             |             |
|---|-------------|-------------|-------------|
| C | -7.01179600 | 0.06400200  | -0.20954600 |
| C | -6.44640300 | -1.22402000 | -0.30405800 |
| N | -5.10500100 | -1.41541200 | -0.24241700 |
| C | -4.32257000 | -0.30013900 | -0.08324600 |
| C | -4.90041000 | 1.00304300  | 0.00631400  |
| N | -6.23491100 | 1.16953500  | -0.05604800 |
| H | -8.09236900 | 0.22693100  | -0.25677700 |
| H | -7.06040300 | -2.12268700 | -0.43137200 |
| H | -4.27422300 | 1.90499600  | 0.12396800  |
| N | -2.93304700 | -0.56795100 | -0.00353300 |
| H | -2.66994300 | -1.55500600 | -0.11455200 |
| C | -1.92299000 | 0.42466800  | 0.09652900  |
| O | -2.18913100 | 1.61114600  | 0.06742700  |
| C | -0.56322300 | -0.09447800 | 0.24360400  |
| C | -0.07047500 | -1.30439700 | 0.66590100  |
| S | 0.72508100  | 0.99998800  | -0.12290200 |
| C | 1.35956900  | -1.35158800 | 0.68478800  |
| H | -0.67299300 | -2.15048400 | 0.97435000  |
| C | 1.94700000  | -0.17453000 | 0.27983500  |
| H | 1.90207500  | -2.23322700 | 1.00238900  |
| C | 3.32505600  | 0.17112400  | 0.15458600  |
| C | 3.95824000  | 1.37692700  | 0.28560100  |
| S | 4.49434700  | -1.07659100 | -0.23680500 |
| C | 5.38206700  | 1.30819700  | 0.07361700  |
| H | 3.47011400  | 2.31204200  | 0.53409600  |
| C | 5.83510000  | 0.05528700  | -0.21794800 |
| H | 6.00539700  | 2.18919200  | 0.14781600  |
| C | 7.19313000  | -0.42876500 | -0.49673600 |
| H | 7.52278200  | -1.18407600 | 0.23624300  |
| H | 7.27238300  | -0.89116700 | -1.49493200 |
| H | 7.93632300  | 0.38478900  | -0.46680300 |

### XYZ Coordinates of the lowest energy conformer of 4m

|   |             |             |             |
|---|-------------|-------------|-------------|
| C | 8.64659600  | 0.13220100  | -0.37496600 |
| C | 8.18822100  | 0.14515200  | 0.95921800  |
| N | 6.86625000  | 0.08148600  | 1.25356300  |
| C | 5.99559200  | 0.00293300  | 0.19706600  |
| C | 6.46316400  | -0.00364500 | -1.15098800 |
| N | 7.78176800  | 0.05921100  | -1.42070200 |
| H | 9.71173100  | 0.18155600  | -0.62140400 |
| H | 8.87476200  | 0.20760700  | 1.81141900  |
| H | 5.76630300  | -0.05519200 | -2.00592700 |
| N | 4.62964900  | -0.08644100 | 0.57429100  |
| H | 4.45146800  | -0.03827000 | 1.58530400  |
| C | 3.54523900  | -0.09818300 | -0.33527400 |
| O | 3.70581100  | 0.02004900  | -1.53489900 |
| C | 2.22427900  | -0.27780300 | 0.27859900  |
| C | 1.82228000  | -0.79276000 | 1.48431000  |
| S | 0.86282300  | 0.18208900  | -0.68486900 |
| C | 0.39579100  | -0.79841400 | 1.63789900  |
| H | 2.48131100  | -1.17362200 | 2.25567100  |
| C | -0.26161700 | -0.28984400 | 0.54646600  |
| H | -0.08961000 | -1.16641000 | 2.53332600  |
| C | -1.69266200 | -0.13223800 | 0.32584400  |
| C | -2.26522800 | 1.15068200  | 0.27743500  |
| C | -2.49977600 | -1.26881200 | 0.16435900  |
| C | -3.64066300 | 1.28567100  | 0.06428800  |
| H | -1.62356100 | 2.02694400  | 0.41347300  |
| C | -3.87778000 | -1.12063300 | -0.04788600 |
| H | -2.04388000 | -2.26357700 | 0.20291500  |
| C | -4.45371500 | 0.15308100  | -0.10035200 |
| H | -5.52920400 | 0.27673600  | -0.26735900 |
| C | -4.28930500 | 2.64459400  | 0.00761200  |
| C | -4.71268400 | -2.36341200 | -0.21557700 |
| F | -4.92075200 | 2.89734300  | -1.15085700 |
| F | -3.47371700 | 3.69868500  | 0.16257100  |
| F | -5.23486800 | 2.83287500  | 0.94351000  |
| F | -6.02703600 | -2.17702800 | -0.40769200 |
| F | -4.65908300 | -3.19614000 | 0.83805000  |
| F | -4.34243700 | -3.12915700 | -1.25543900 |

### XYZ Coordinates of the lowest energy conformer of 4n

|    |             |             |             |
|----|-------------|-------------|-------------|
| C  | -8.28880300 | -0.08264400 | 0.32772600  |
| C  | -7.80689200 | -0.60070700 | -0.89260400 |
| N  | -6.47855500 | -0.67410700 | -1.15472200 |
| C  | -5.62513600 | -0.22369400 | -0.18037700 |
| C  | -6.11736100 | 0.30554800  | 1.05018000  |
| N  | -7.44152800 | 0.36814000  | 1.29011300  |
| H  | -9.35891500 | -0.02139100 | 0.54810700  |
| H  | -8.47925700 | -0.96376500 | -1.67840200 |
| H  | -5.43526900 | 0.68042000  | 1.83342600  |
| N  | -4.24960000 | -0.35256400 | -0.50638700 |
| H  | -4.05601900 | -0.72583100 | -1.44403300 |
| C  | -3.18567300 | 0.11700900  | 0.30150500  |
| O  | -3.38143300 | 0.72370000  | 1.33746100  |
| C  | -1.84219500 | -0.19798200 | -0.19522600 |
| C  | -1.37566600 | -1.10680000 | -1.11106500 |
| S  | -0.53829100 | 0.68814800  | 0.51627000  |
| C  | 0.05073300  | -1.07295200 | -1.25033900 |
| H  | -1.98847300 | -1.79755200 | -1.67805300 |
| C  | 0.64742800  | -0.13951400 | -0.43852900 |
| H  | 0.58033600  | -1.71935500 | -1.93916400 |
| C  | 2.05850900  | 0.18612200  | -0.29214200 |
| C  | 2.49578000  | 1.51768800  | -0.39122300 |
| C  | 2.98778800  | -0.84079500 | -0.04913200 |
| C  | 3.85638000  | 1.79125600  | -0.24164700 |
| H  | 1.78840400  | 2.32678700  | -0.59068500 |
| C  | 4.34761900  | -0.53596300 | 0.09463800  |
| H  | 2.63766500  | -1.87339600 | 0.03276700  |
| C  | 4.79762800  | 0.78582800  | 0.00135800  |
| H  | 5.85367500  | 1.04563400  | 0.11265100  |
| C  | 5.31045100  | -1.66774300 | 0.35268300  |
| F  | 6.60577400  | -1.33638100 | 0.46413100  |
| F  | 5.30587600  | -2.61190000 | -0.60434200 |
| F  | 5.05766100  | -2.34952400 | 1.48266700  |
| Cl | 4.39543600  | 3.41944000  | -0.36215300 |
